# Supplementary material
Source: PubMed Central journal article supplement (PMC5033727)

## Supporting Information

### *Design and Synthesis of Potent Quinazolines as Selective $\beta$ -Glucocerebrosidase Modulators*

Jianbin Zheng<sup>1,2</sup>, Long Chen<sup>1</sup>, Michael Schwake<sup>1</sup>, Richard B. Silverman<sup>2\*</sup>, Dimitri Krainc<sup>1\*</sup>

<sup>1</sup> Department of Neurology, Northwestern University Feinberg School of Medicine, Chicago, Illinois, USA

<sup>2</sup> Department of Chemistry, Department of Molecular Biosciences, Chemistry of Life Processes Institute, Center for Molecular Innovation and Drug Discovery, and Center for Developmental Therapeutics, Northwestern University, Evanston, Illinois, USA

#### Table of Contents

|                                                          |     |
|----------------------------------------------------------|-----|
| <sup>1</sup> HNMR spectra for compound <b>4</b> .....    | S2  |
| <sup>13</sup> CNMR spectra for compound <b>4</b> .....   | S3  |
| <sup>1</sup> HNMR spectra for compound <b>6c</b> .....   | S4  |
| <sup>13</sup> CNMR spectra for compound <b>6c</b> .....  | S5  |
| <sup>1</sup> HNMR spectra for compound <b>7a</b> .....   | S6  |
| <sup>13</sup> CNMR spectra for compound <b>7a</b> .....  | S7  |
| <sup>1</sup> HNMR spectra for compound <b>7b</b> .....   | S8  |
| <sup>13</sup> CNMR spectra for compound <b>7b</b> .....  | S9  |
| <sup>1</sup> HNMR spectra for compound <b>8c</b> .....   | S10 |
| <sup>13</sup> CNMR spectra for compound <b>8c</b> .....  | S11 |
| <sup>1</sup> HNMR spectra for compound <b>9a</b> .....   | S12 |
| <sup>13</sup> CNMR spectra for compound <b>9a</b> .....  | S13 |
| <sup>1</sup> HNMR spectra for compound <b>9b</b> .....   | S14 |
| <sup>13</sup> CNMR spectra for compound <b>9b</b> .....  | S15 |
| <sup>1</sup> HNMR spectra for compound <b>9c</b> .....   | S16 |
| <sup>13</sup> CNMR spectra for compound <b>9c</b> .....  | S17 |
| <sup>1</sup> HNMR spectra for compound <b>11b</b> .....  | S18 |
| <sup>13</sup> CNMR spectra for compound <b>11b</b> ..... | S19 |
| <sup>1</sup> HNMR spectra for compound <b>11d</b> .....  | S20 |
| <sup>13</sup> CNMR spectra for compound <b>11d</b> ..... | S21 |
| <sup>1</sup> HNMR spectra for compound <b>11f</b> .....  | S22 |
| <sup>13</sup> CNMR spectra for compound <b>11f</b> ..... | S23 |
| <sup>1</sup> HNMR spectra for compound <b>11g</b> .....  | S24 |
| <sup>13</sup> CNMR spectra for compound <b>11g</b> ..... | S25 |
| <sup>1</sup> HNMR spectra for compound <b>11h</b> .....  | S26 |
| <sup>13</sup> CNMR spectra for compound <b>11h</b> ..... | S27 |

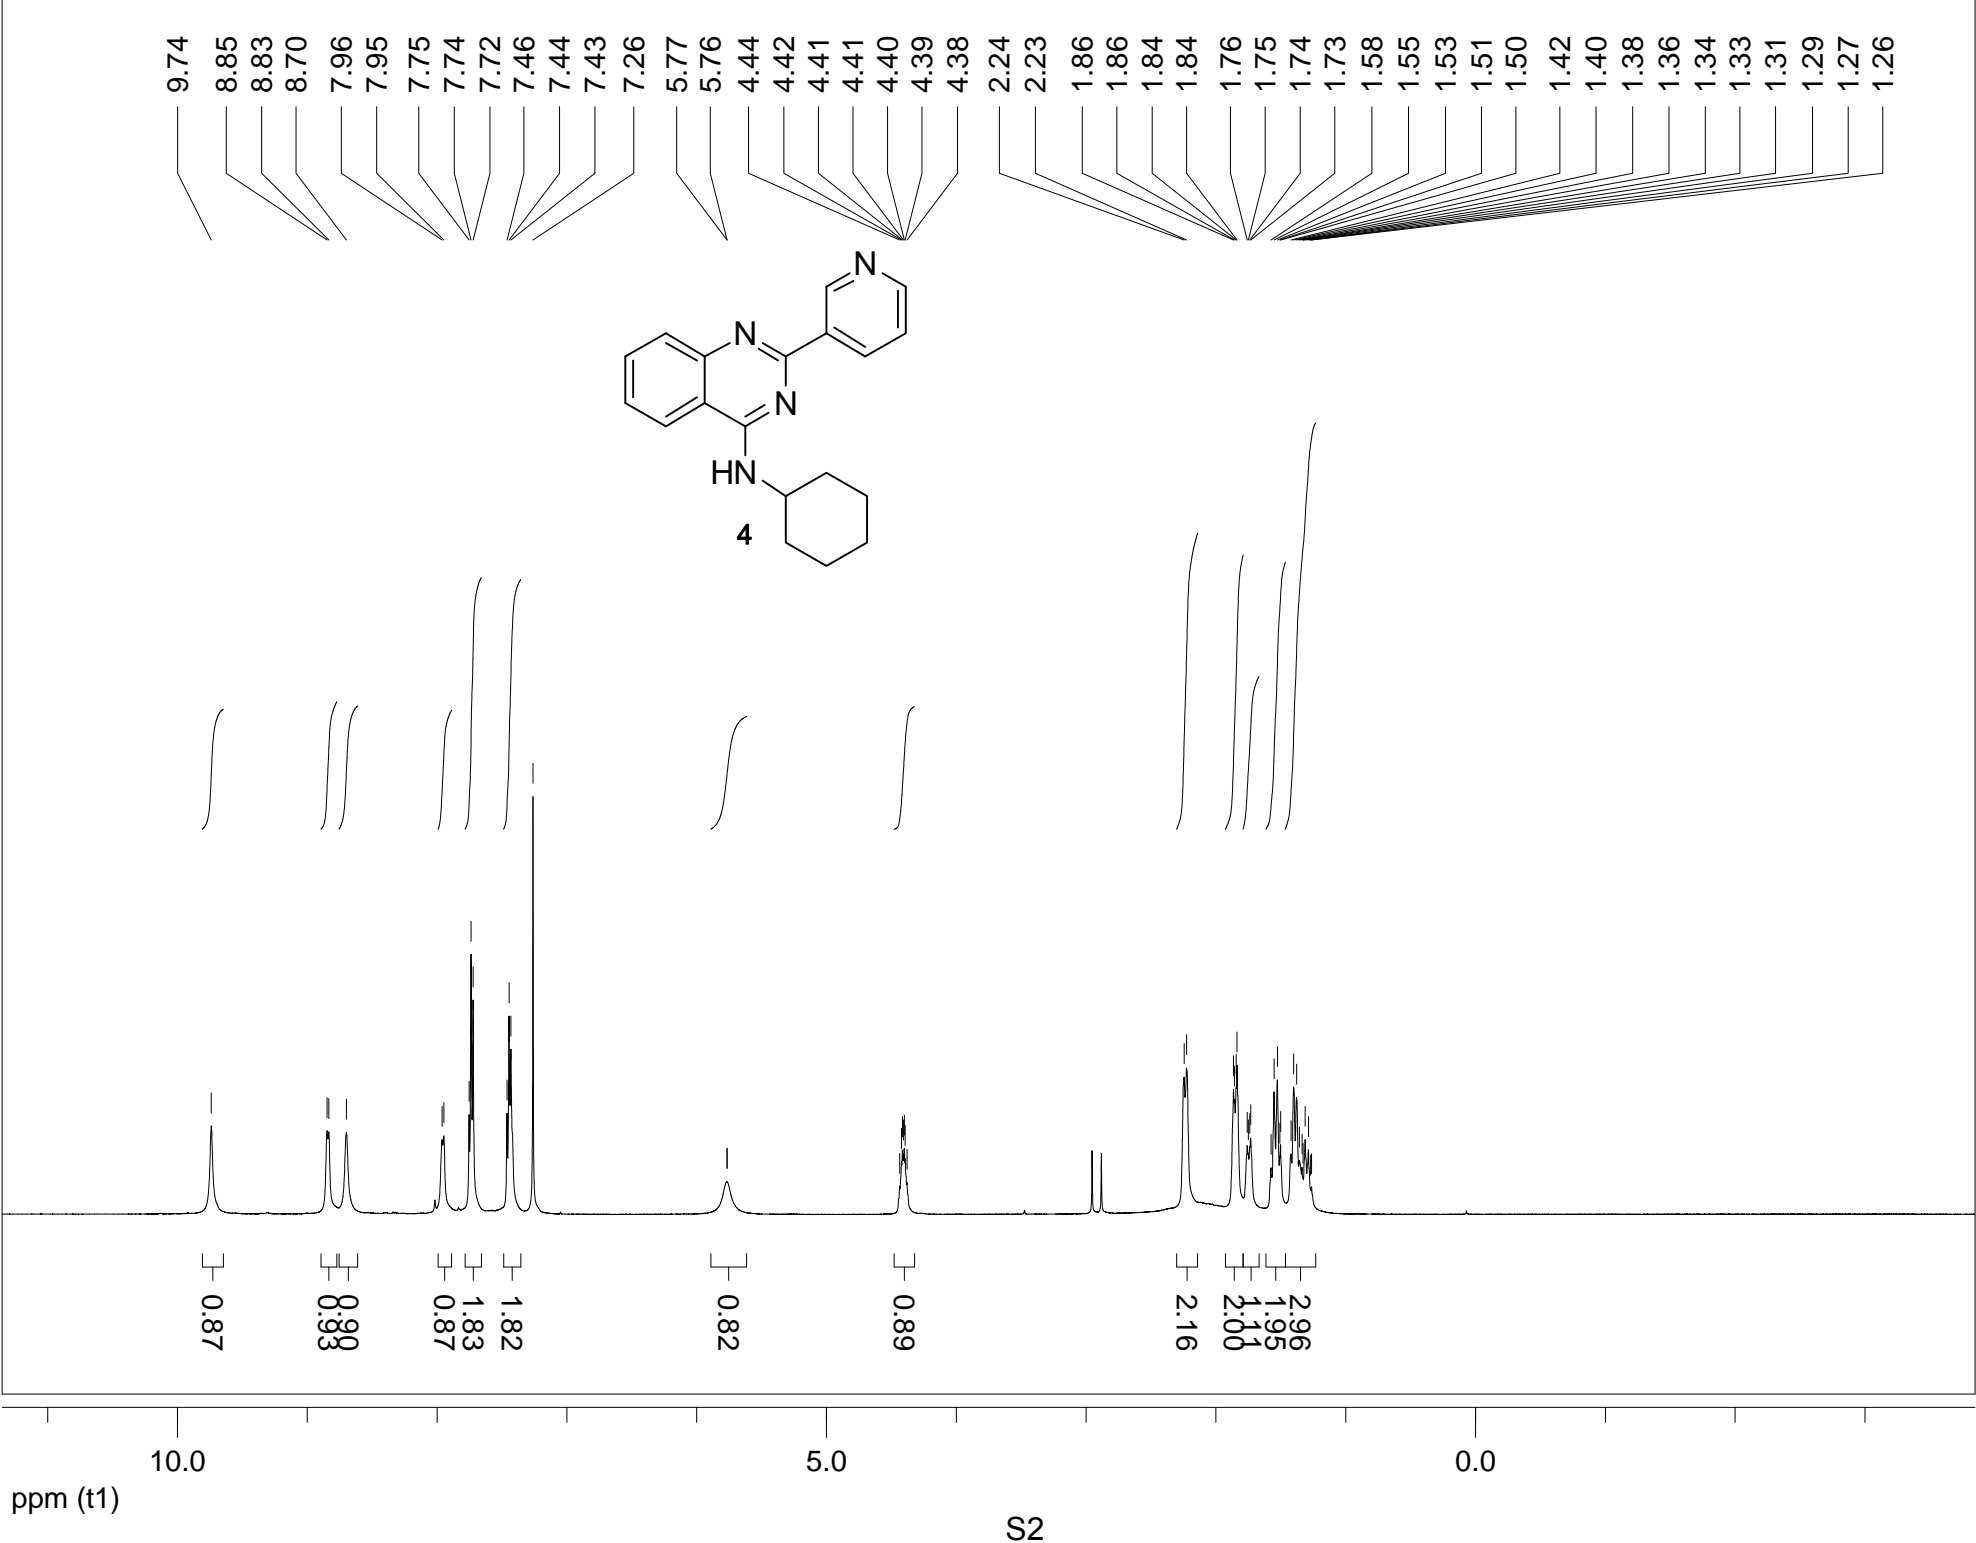

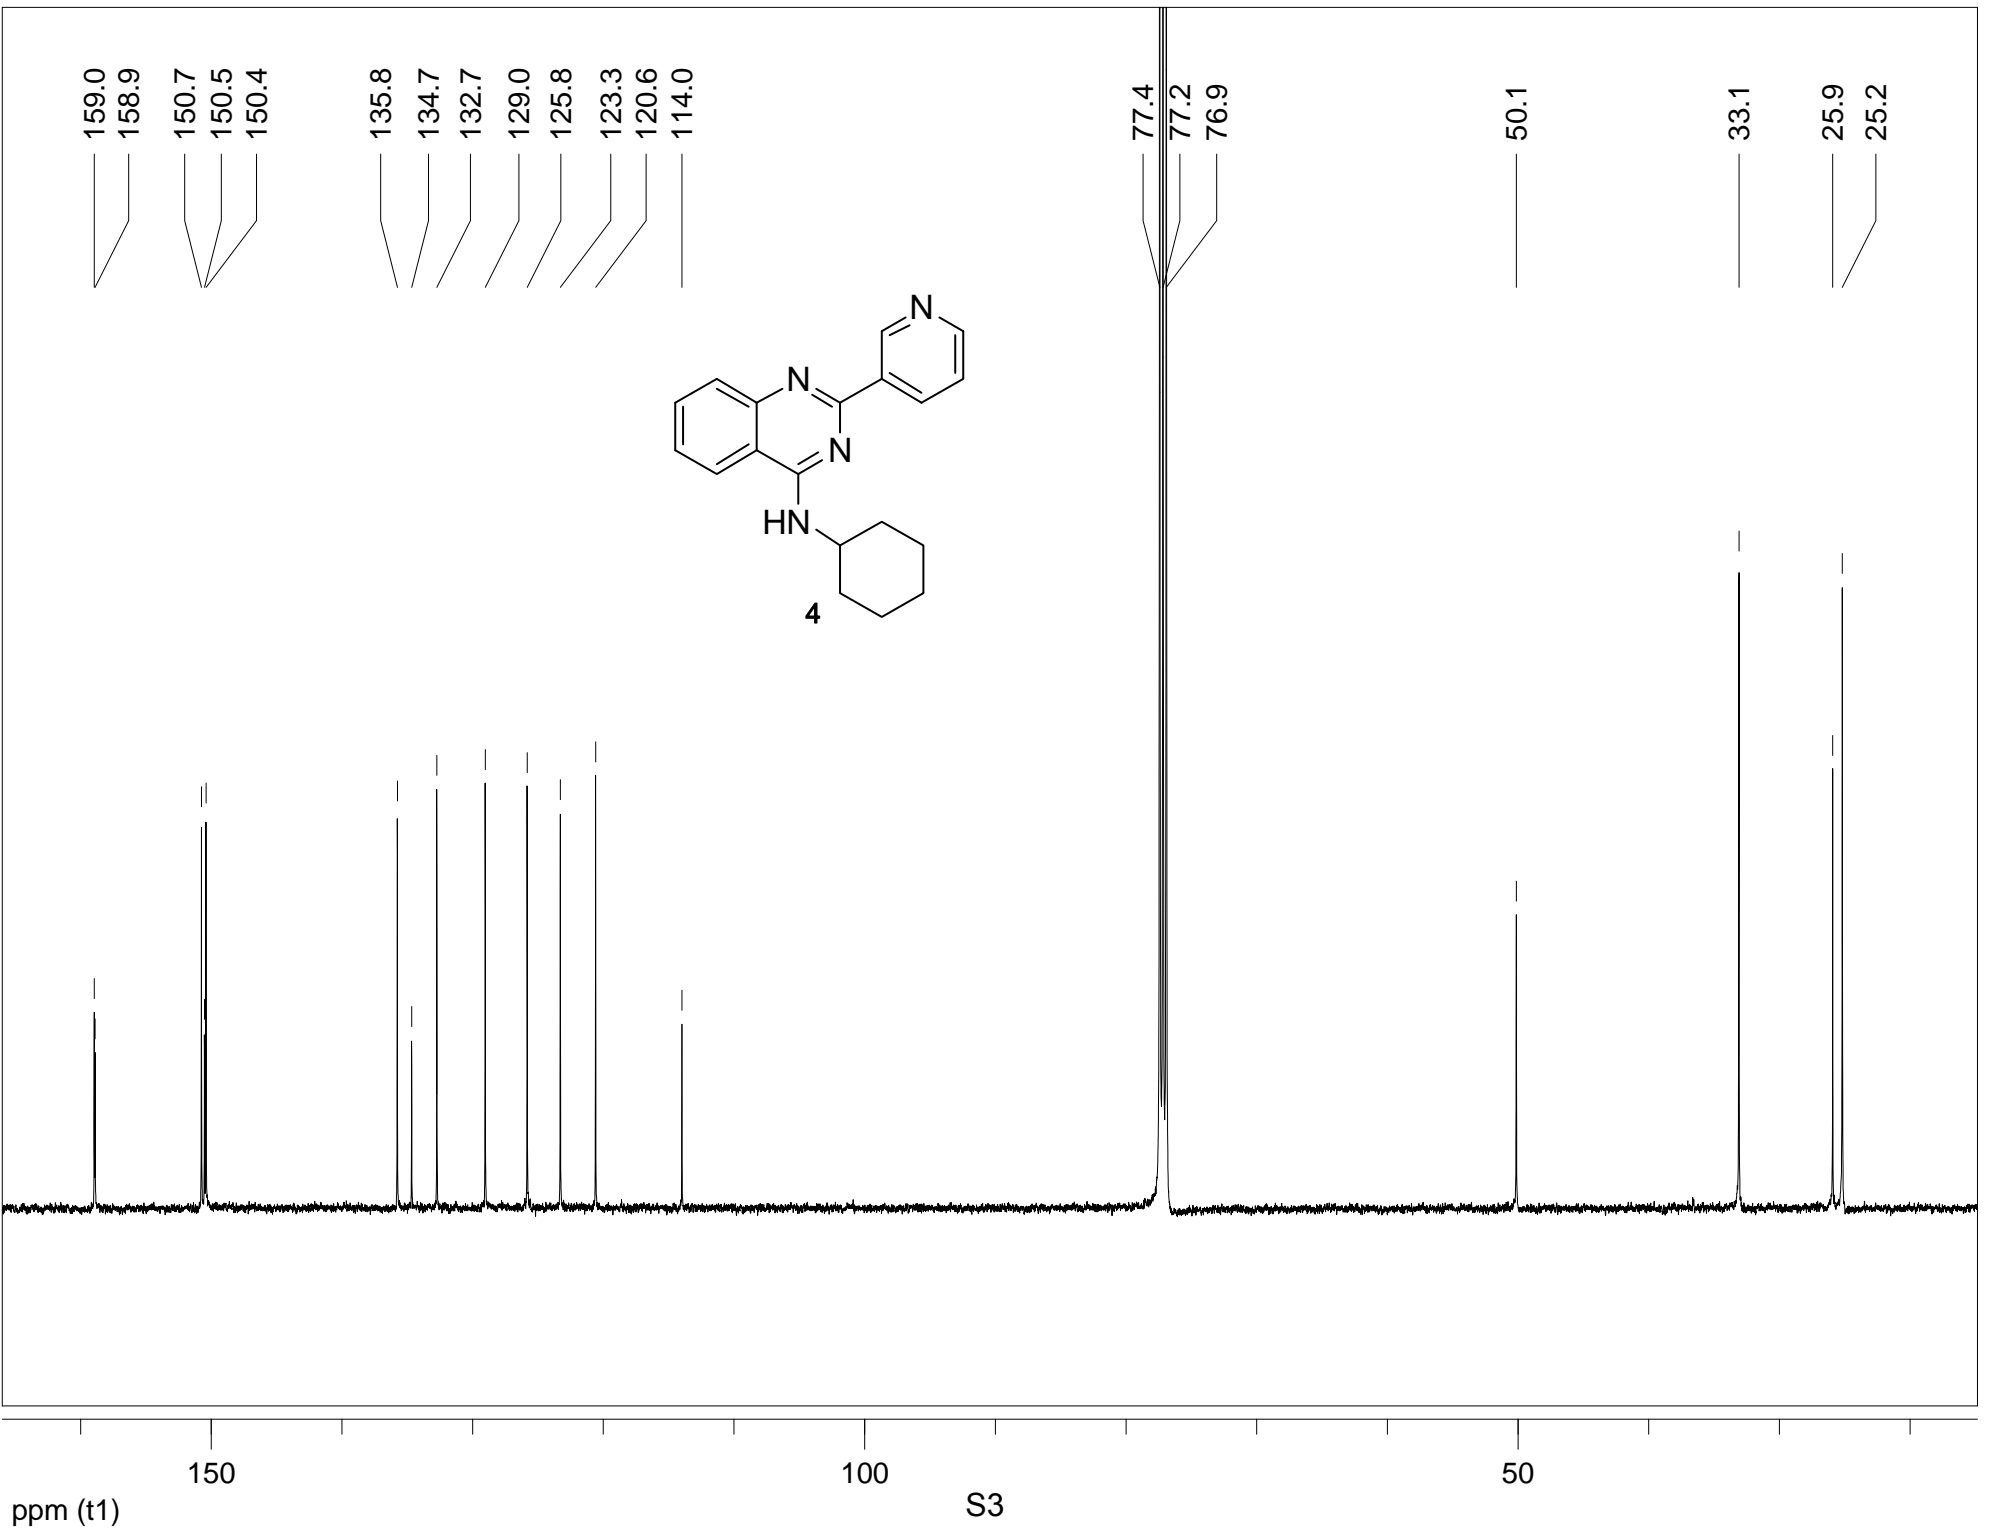

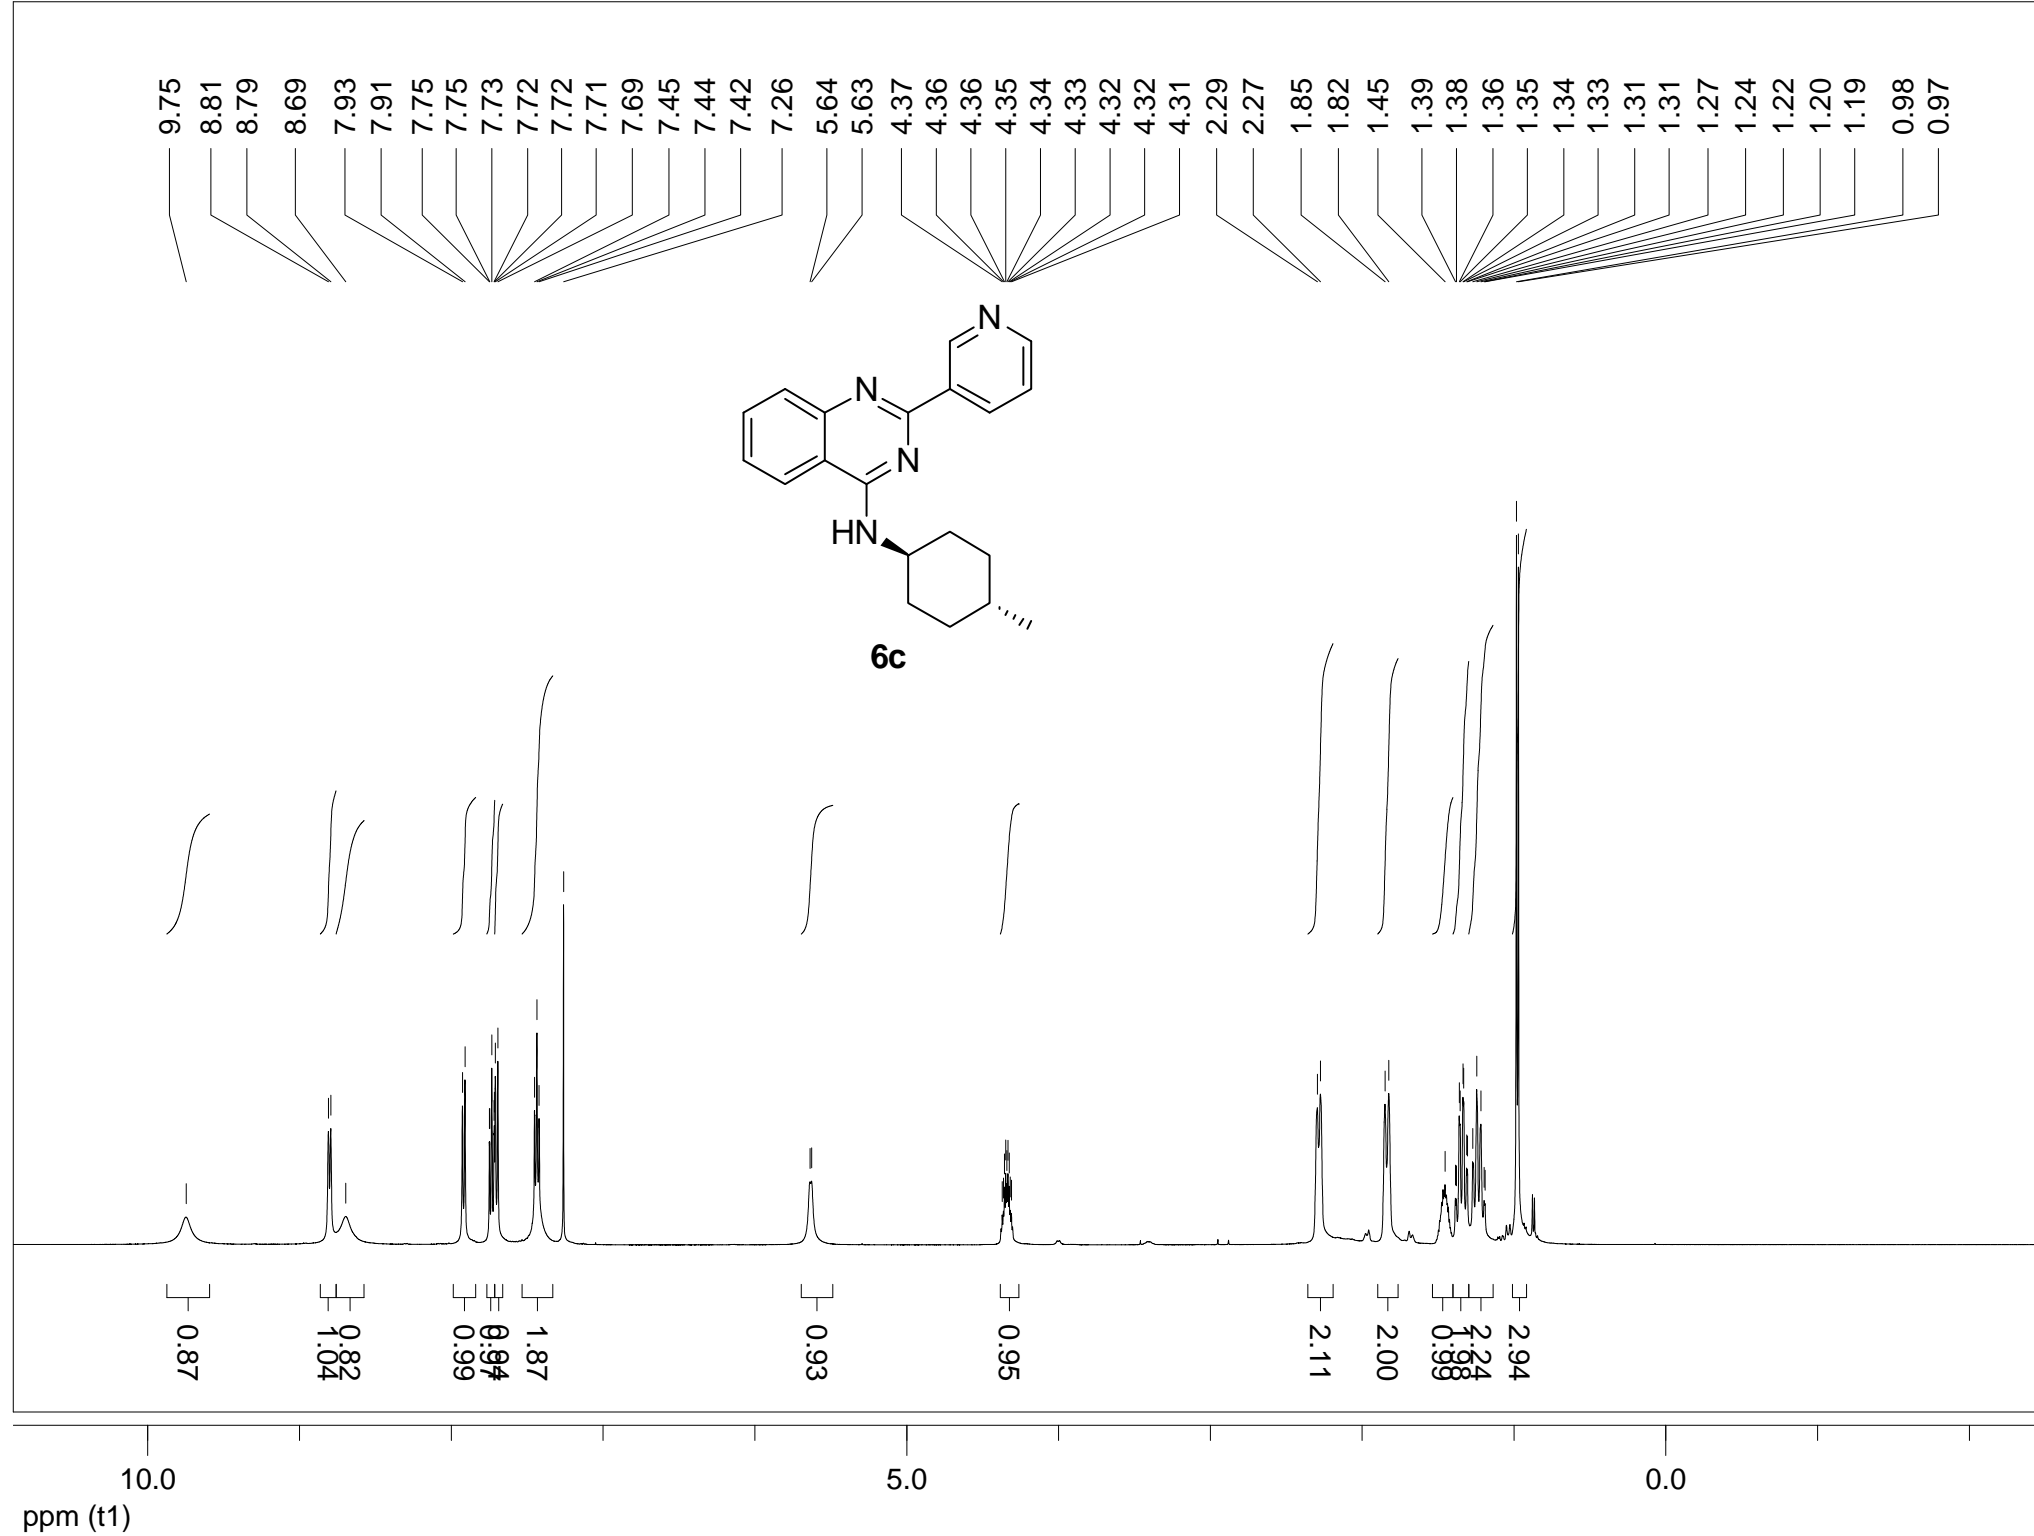

159.1  
158.9  
150.8  
150.6  
150.5  
135.7  
134.7  
132.8  
129.1  
125.8  
123.3  
120.6  
114.0

77.5  
77.2  
76.9

50.5

34.2  
33.1  
32.4  
22.4

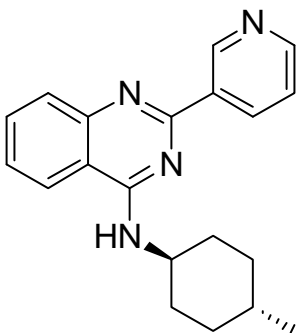

6c

ppm (t1)

150

100

50

S5

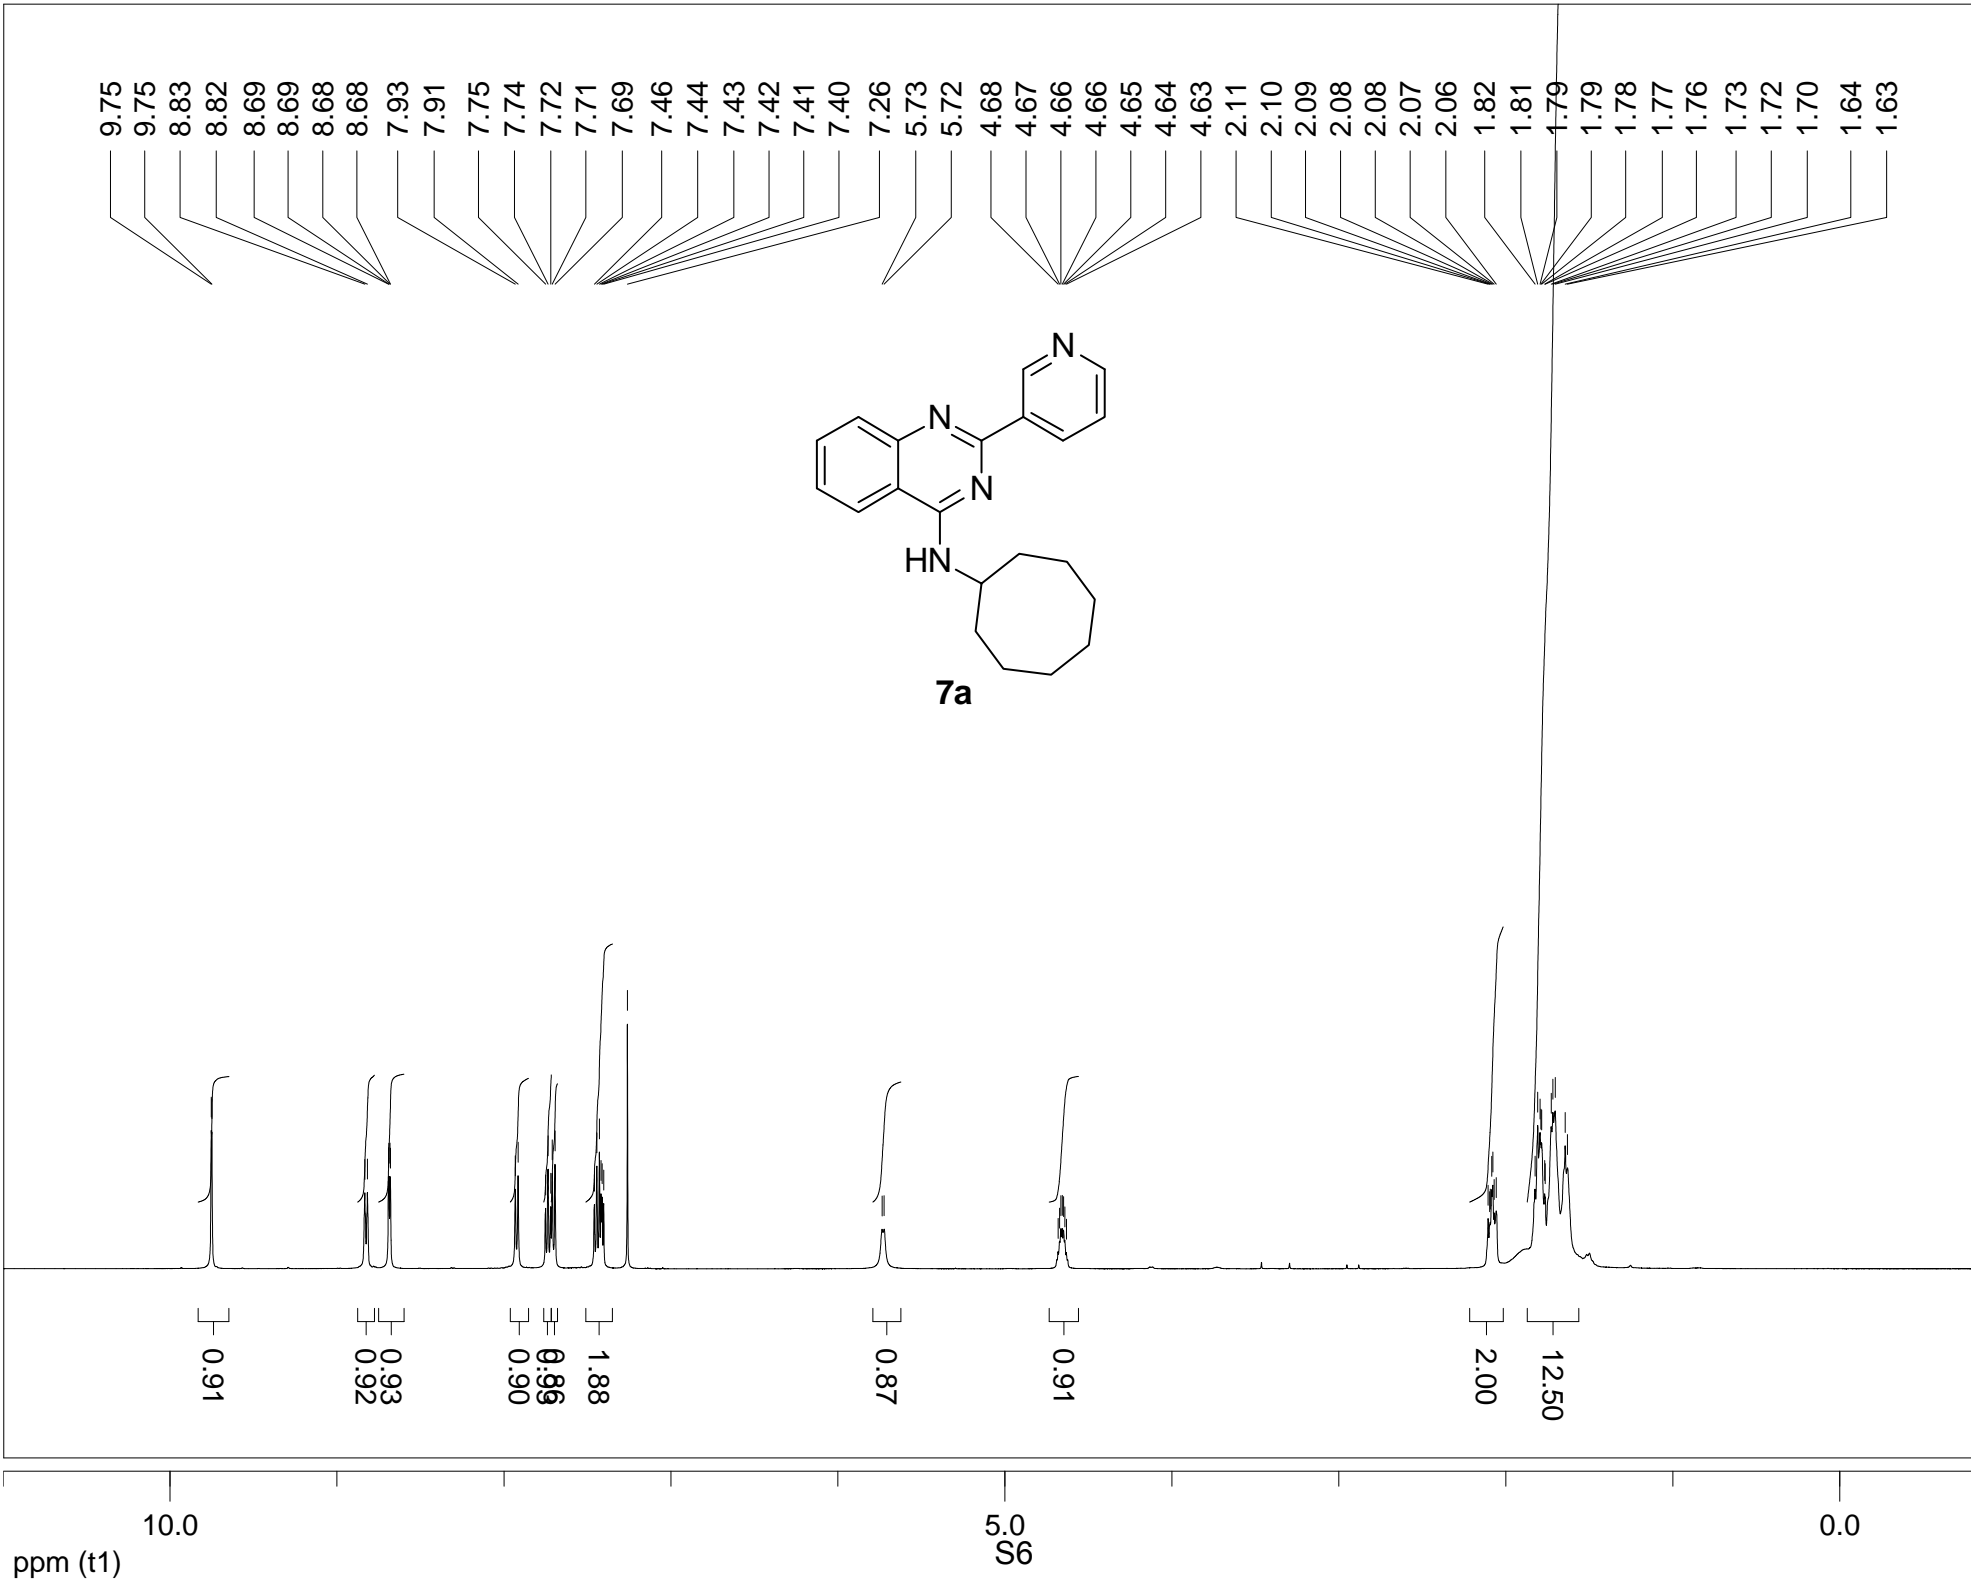

158.8  
158.6  
150.8  
150.4  
150.3

135.9  
134.6  
132.8  
128.9  
125.9  
123.3  
120.6  
114.0

77.4  
77.2  
76.9

51.0

32.7  
27.2  
26.1  
24.2

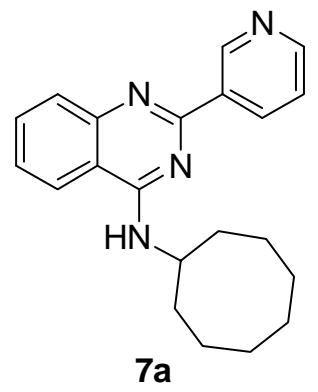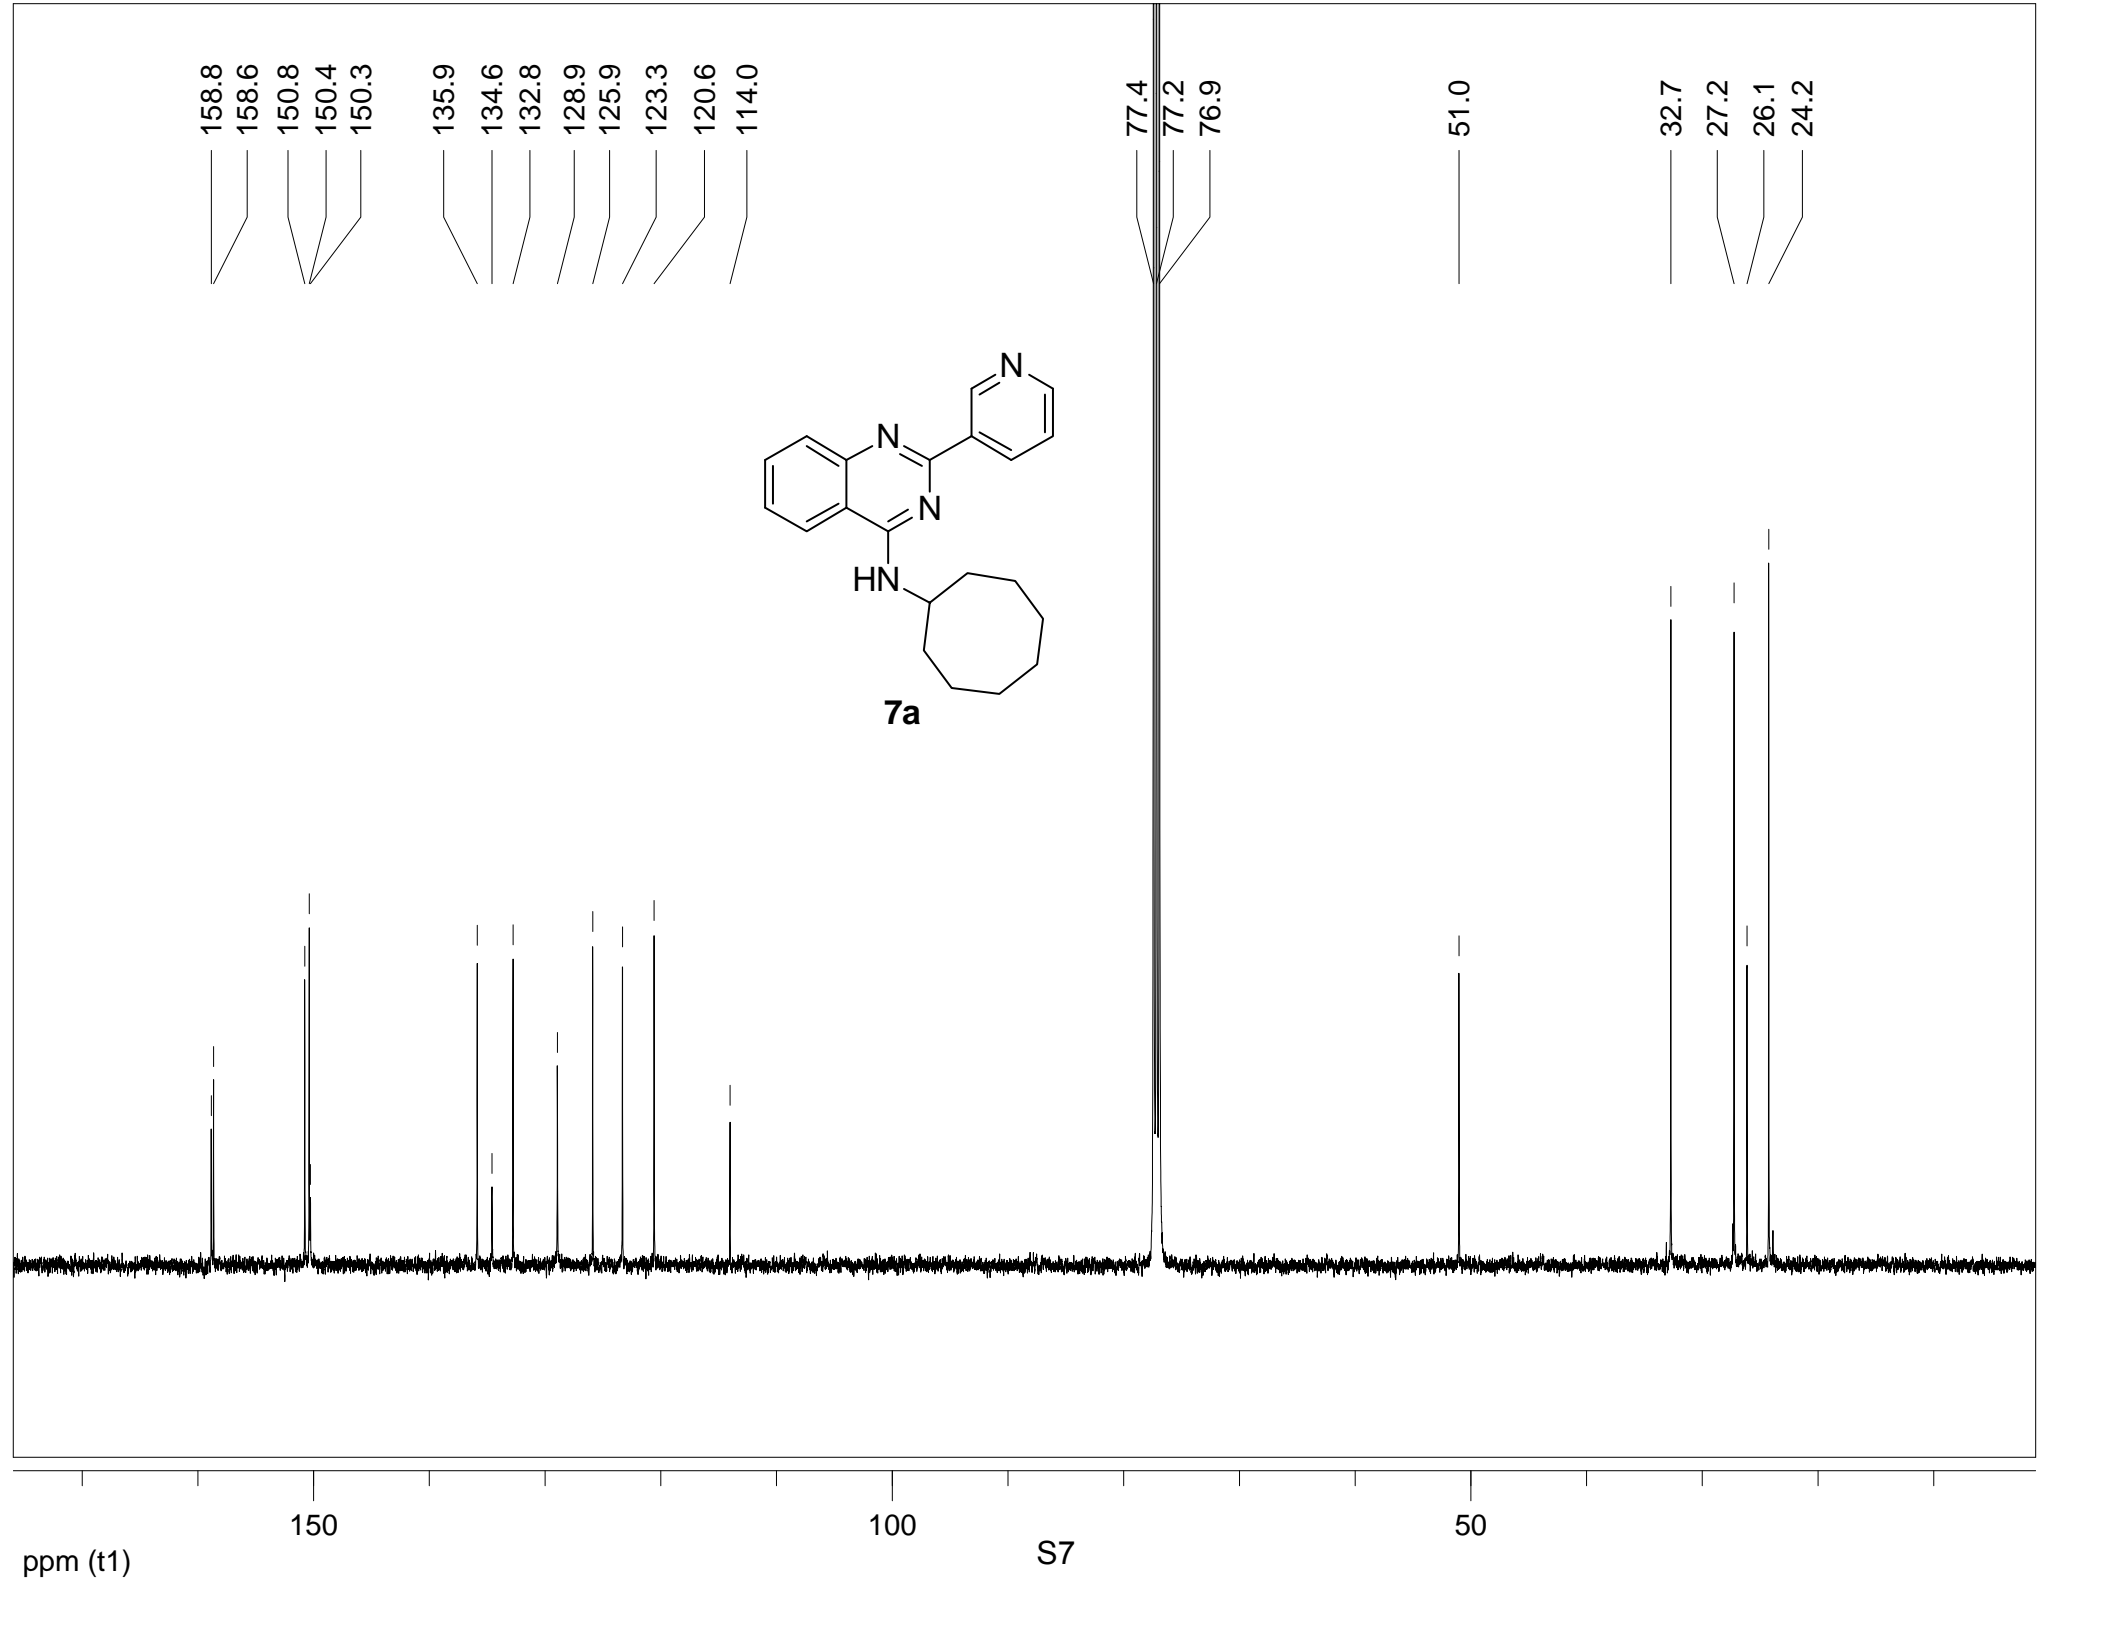

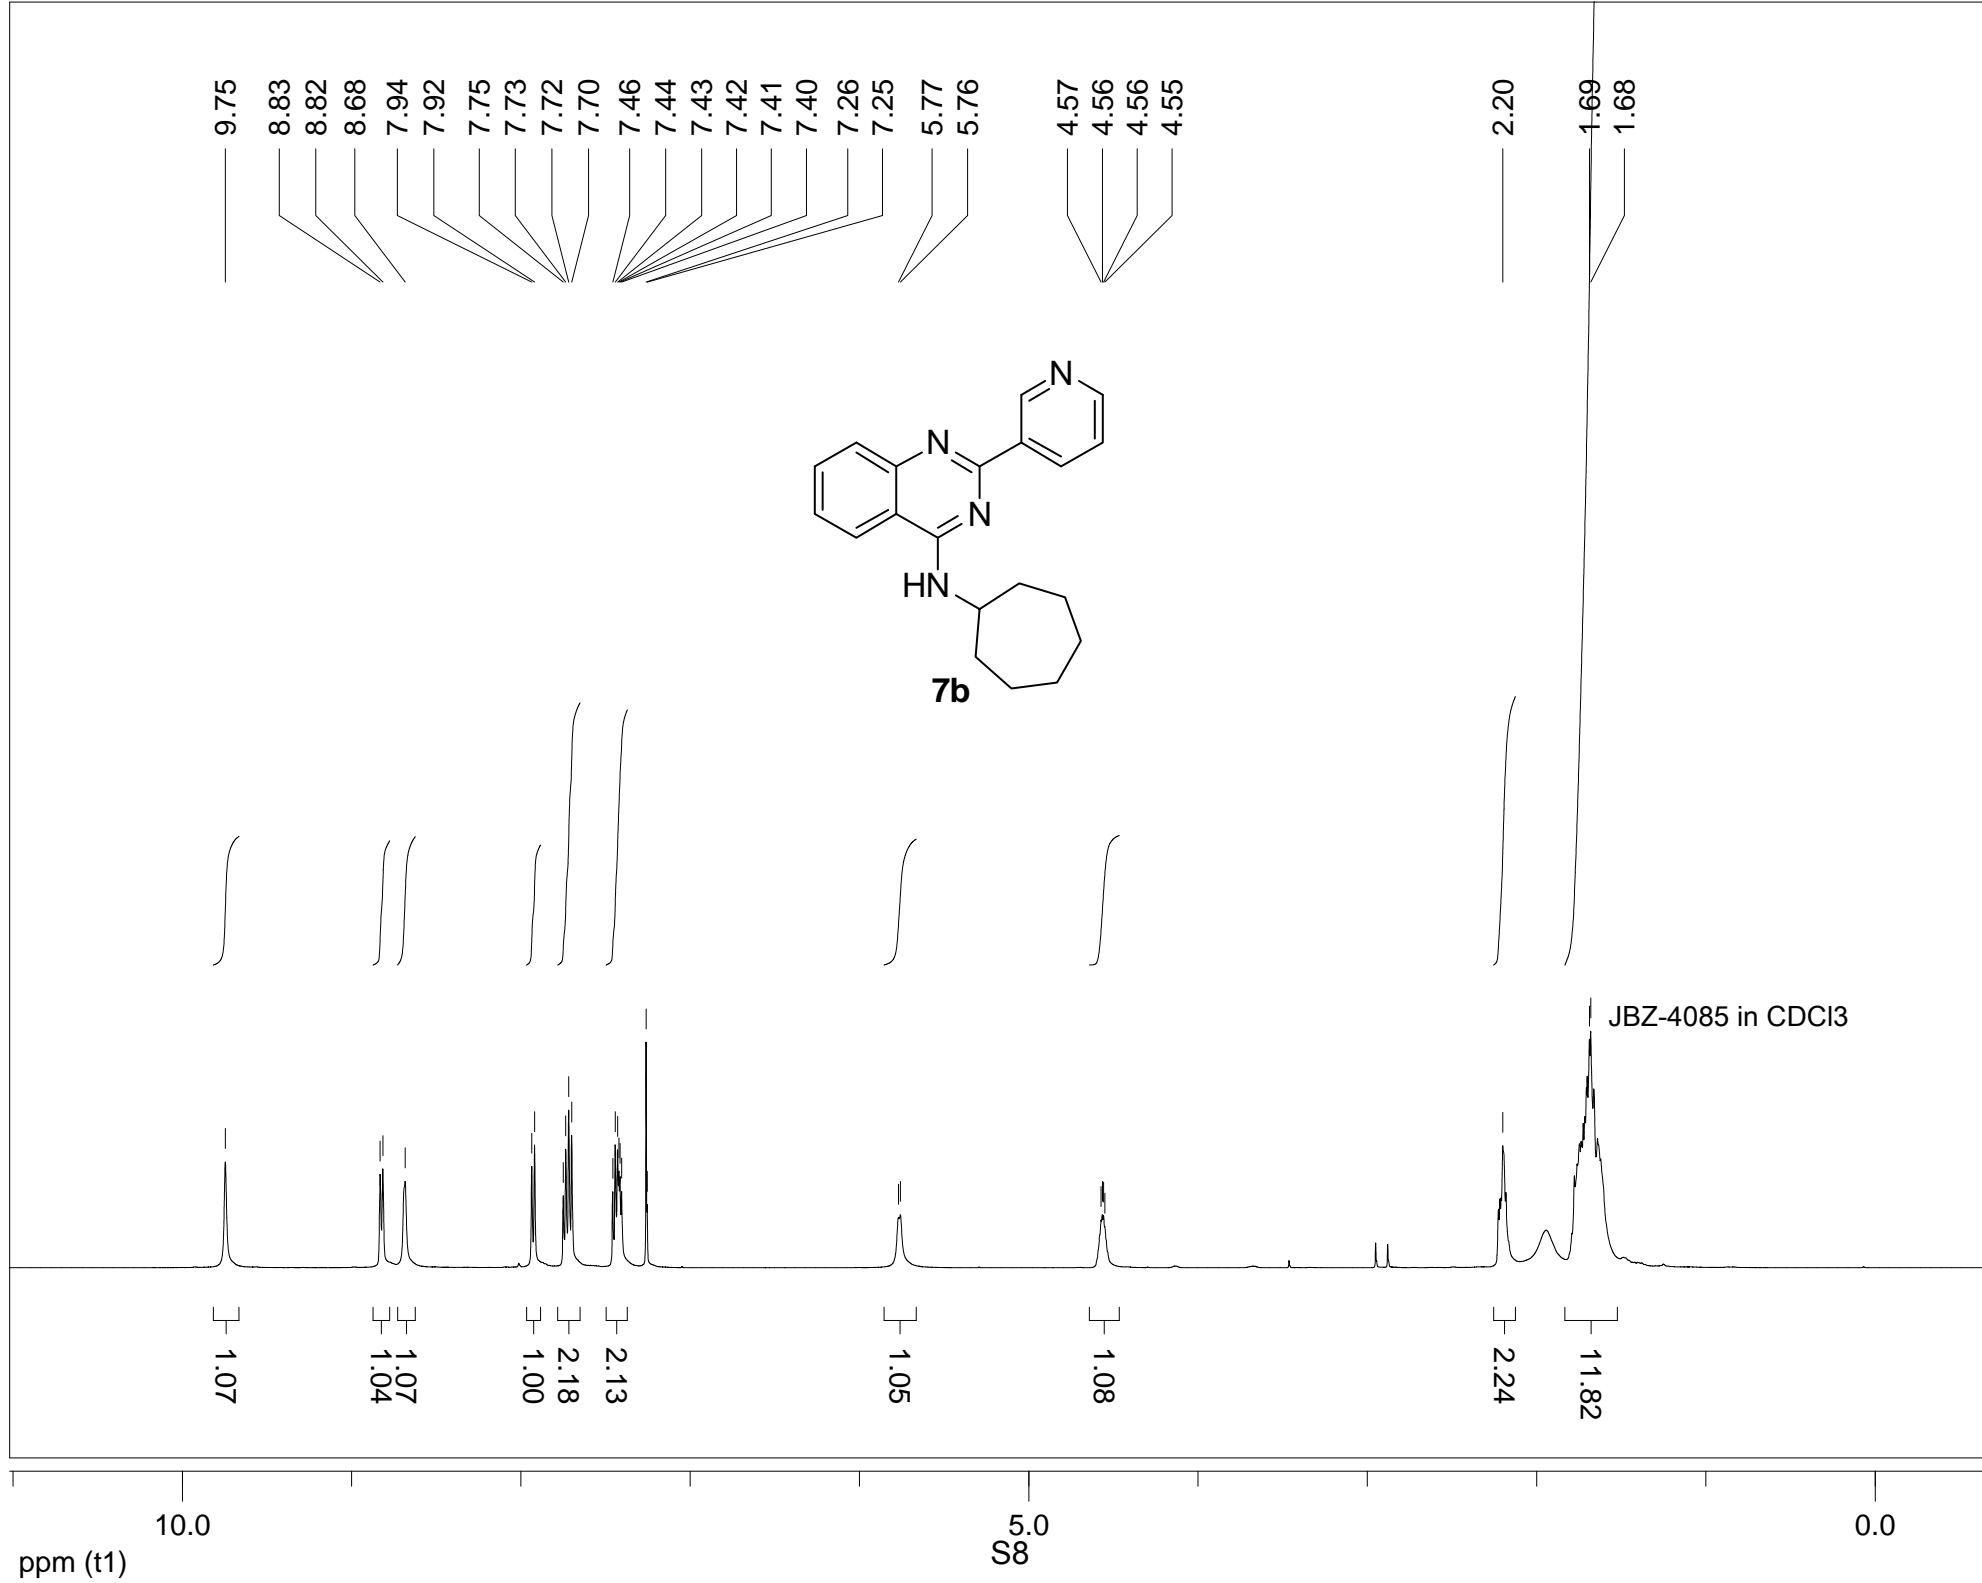



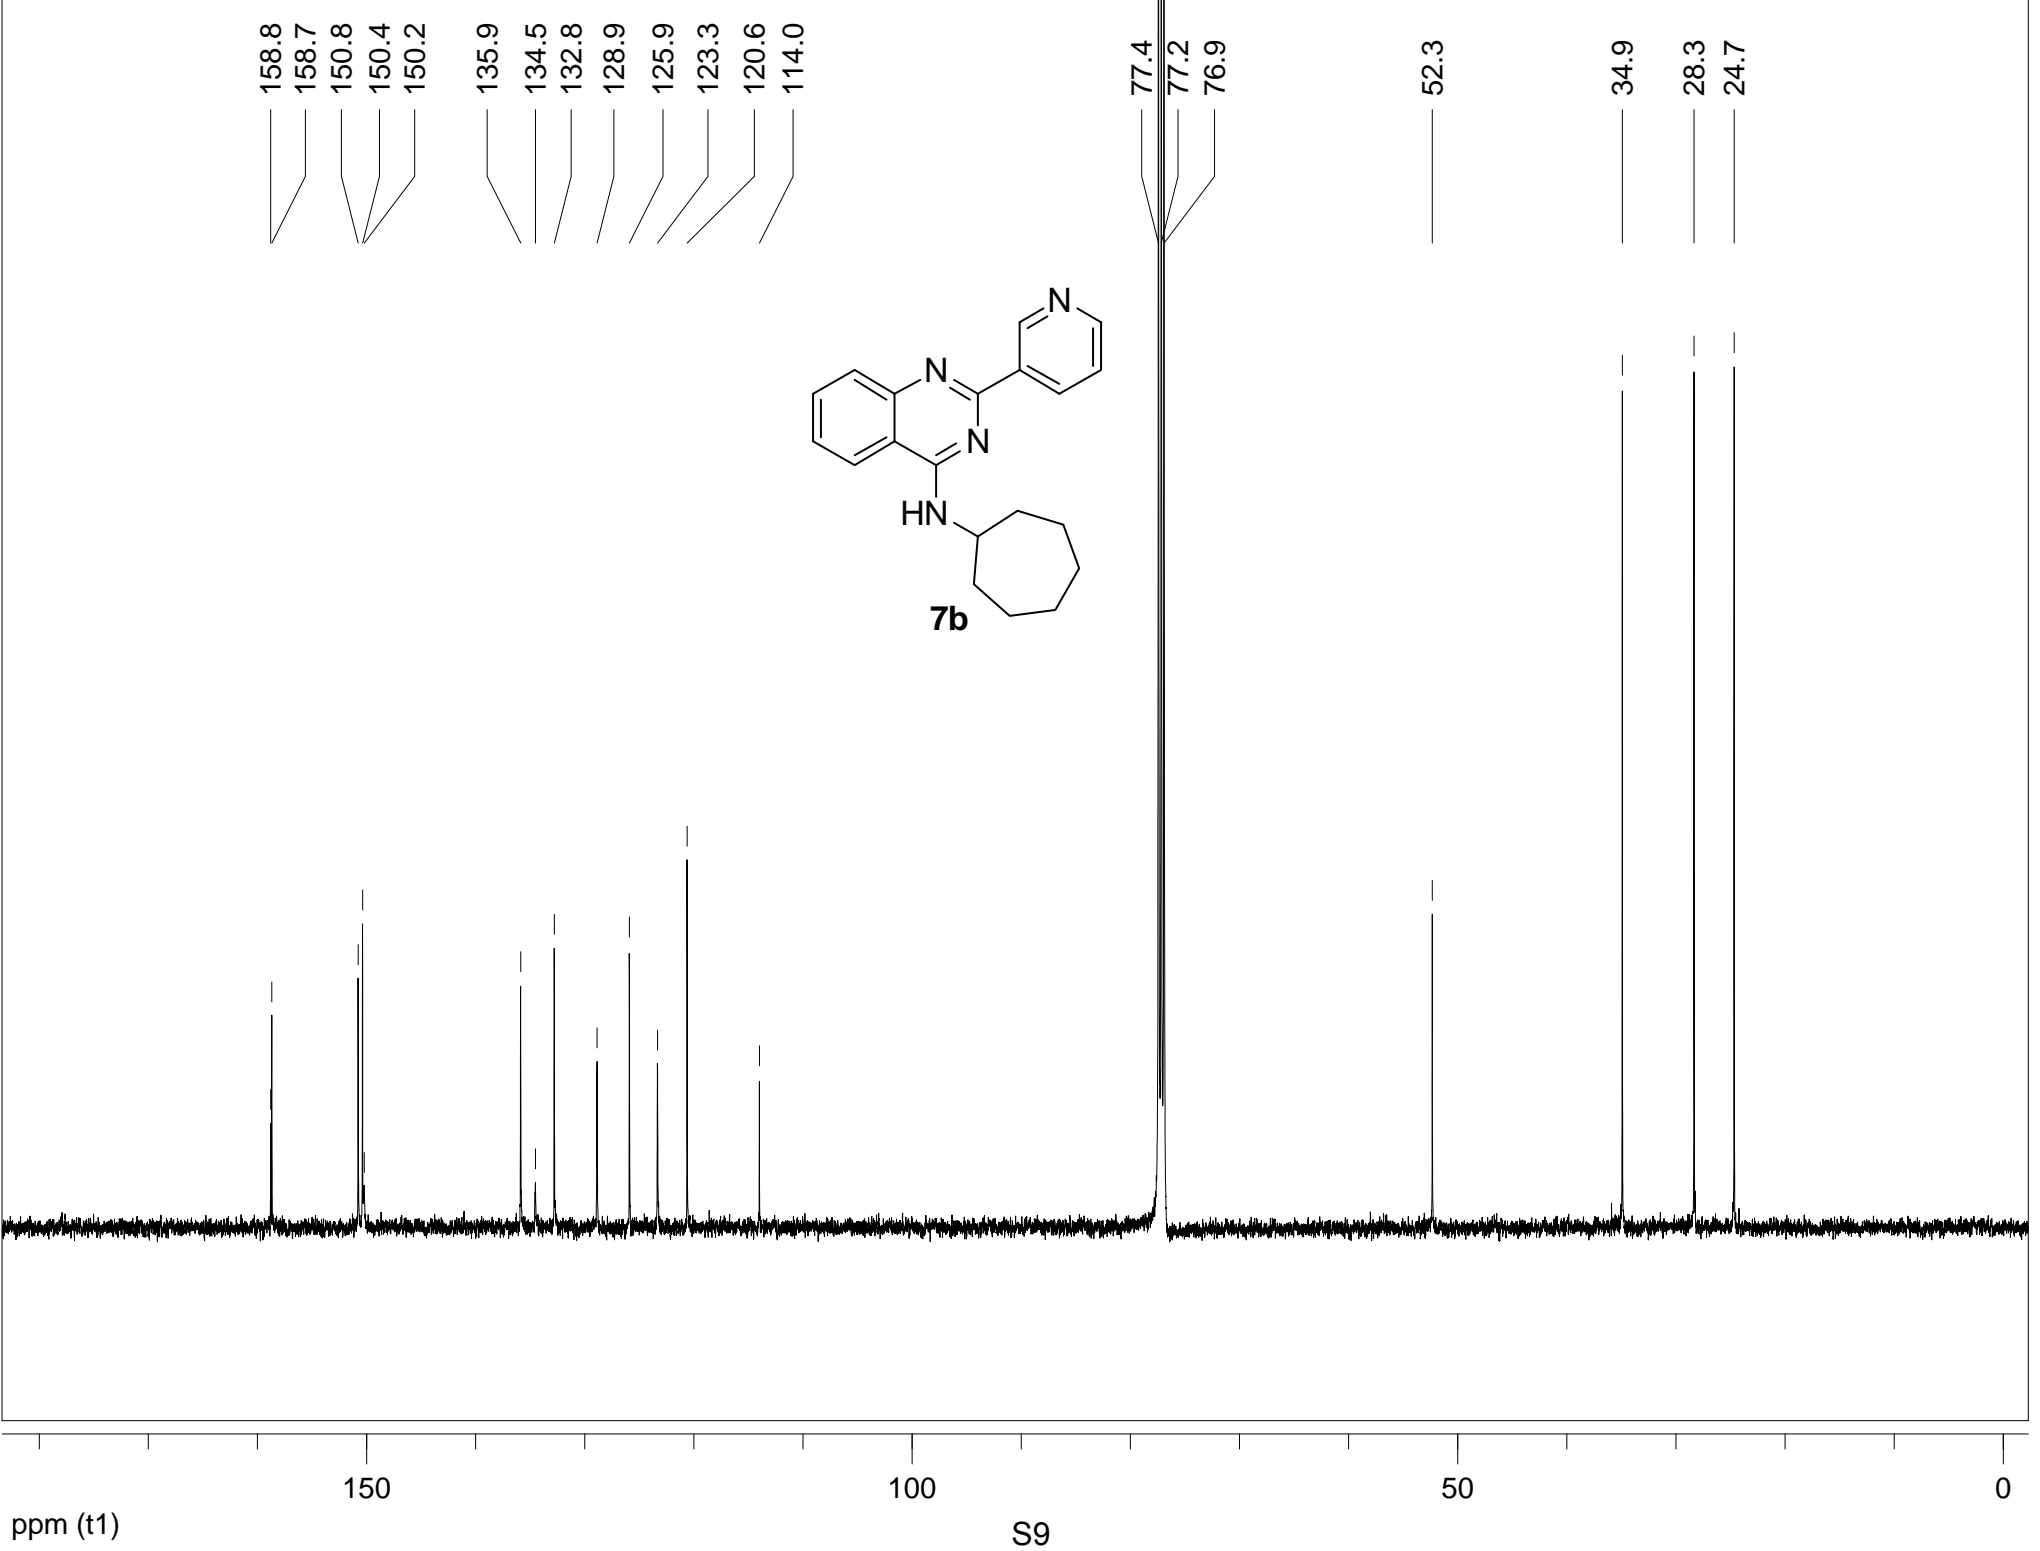

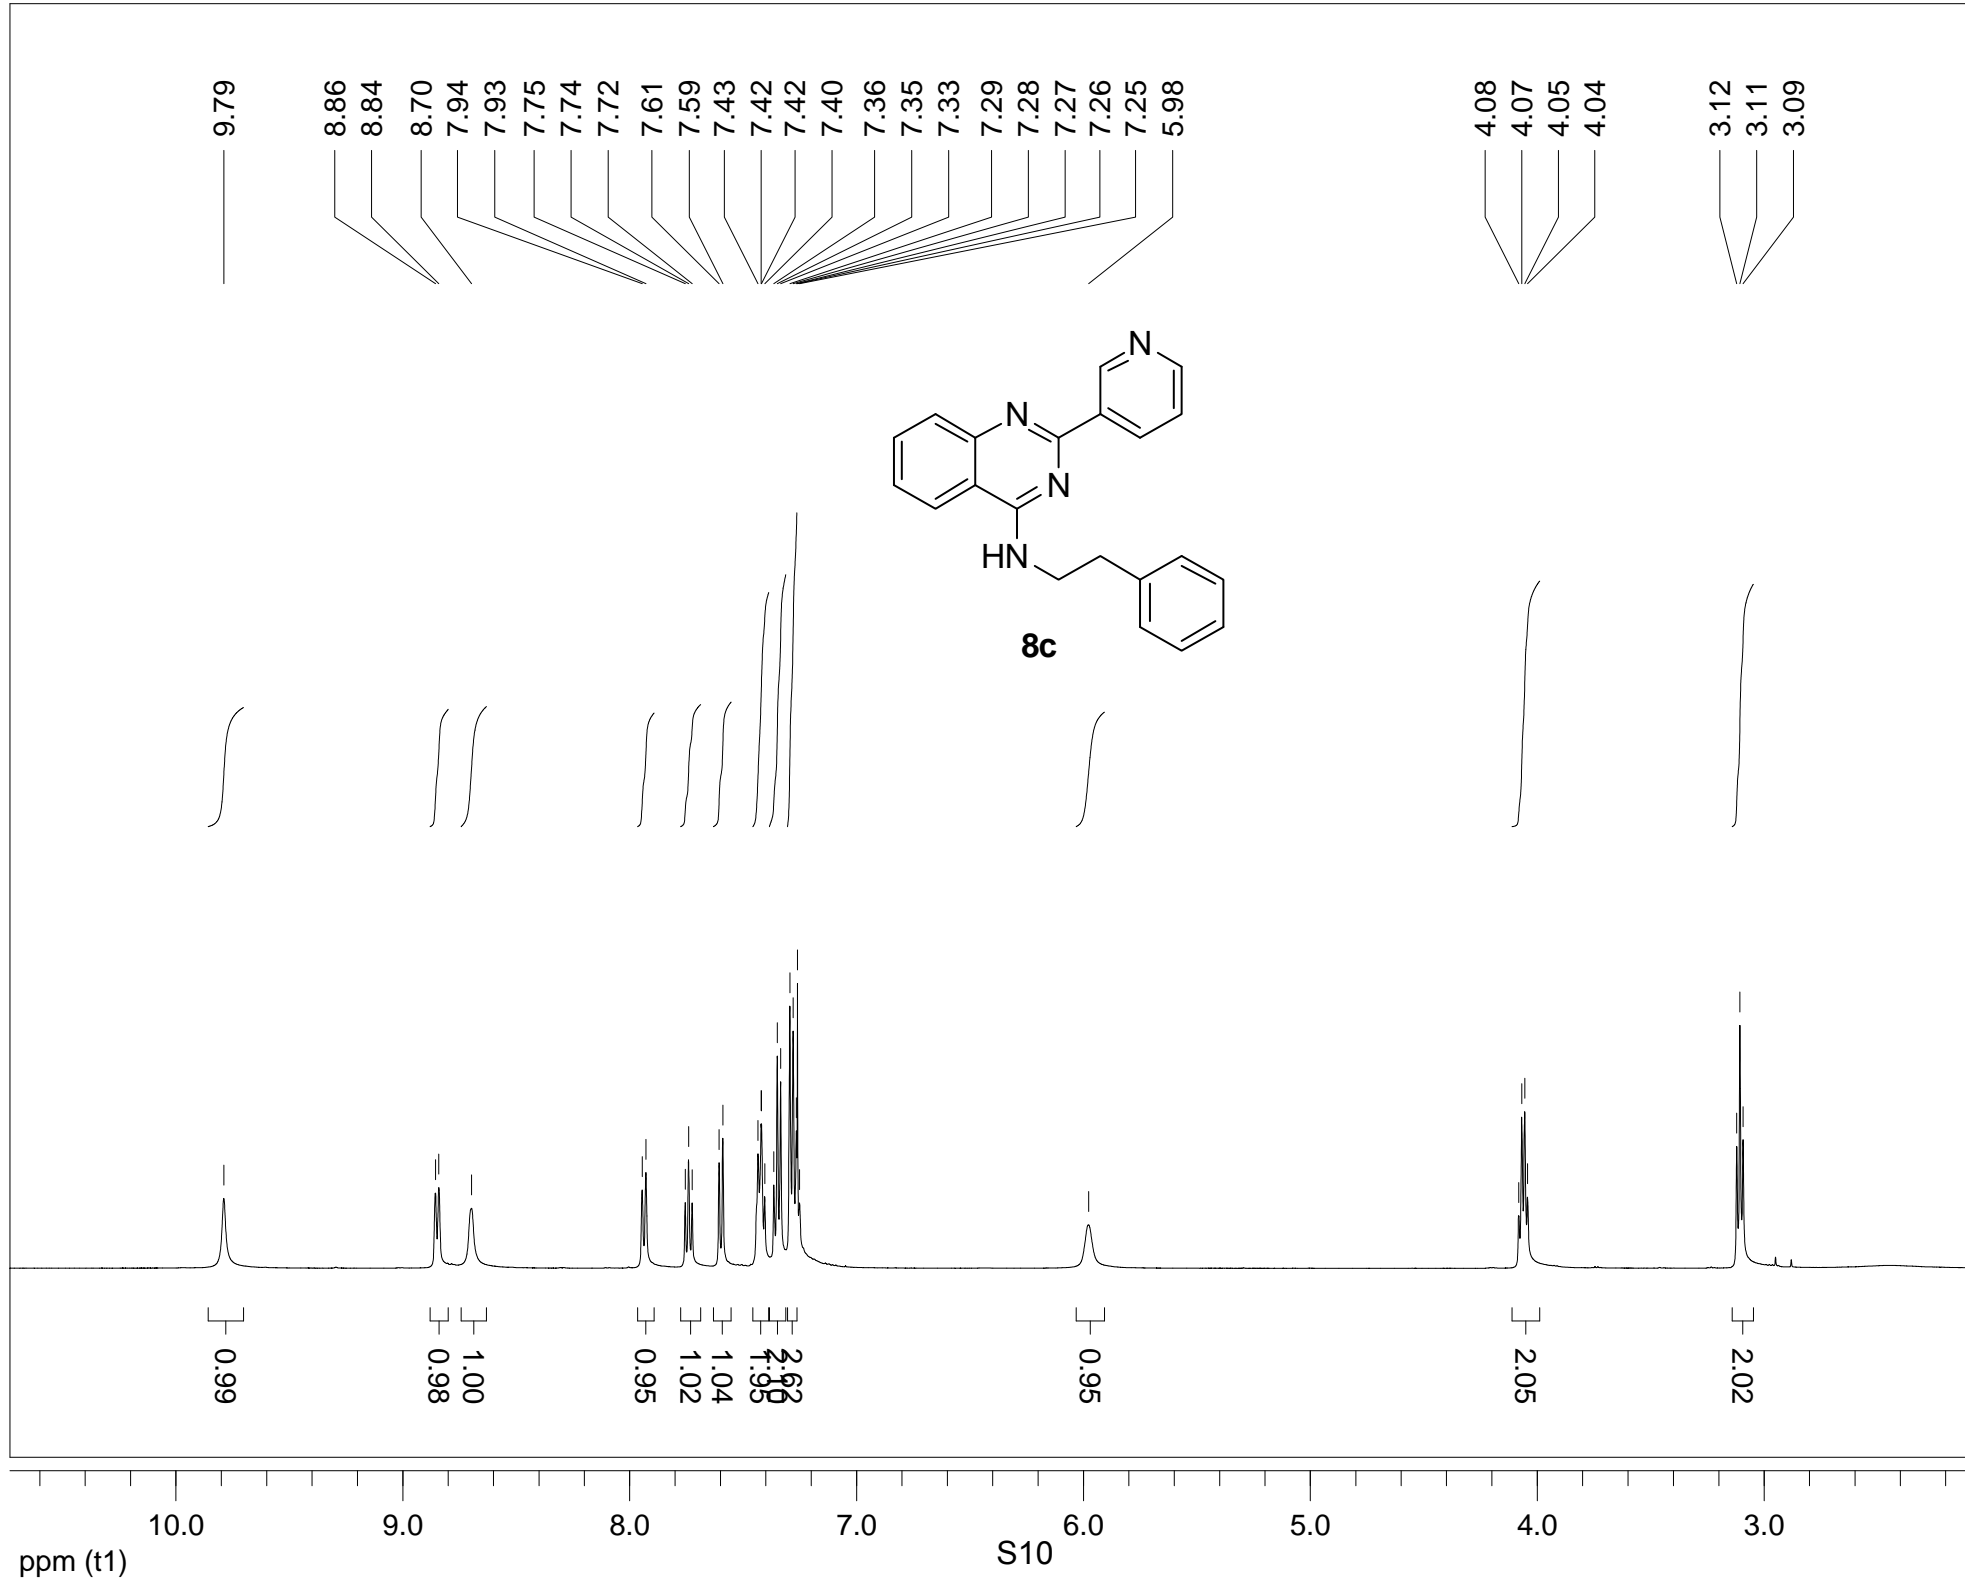

159.7  
158.8  
150.8  
150.3  
150.3  
139.1  
135.9  
134.5  
132.9  
129.0  
128.9  
126.8  
126.1  
123.3  
120.6  
114.0

77.4  
77.2  
76.9

42.7

35.5

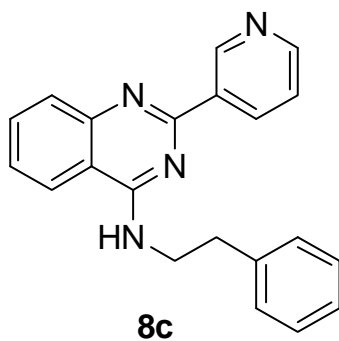

ppm (t1)

150

100

S11

50

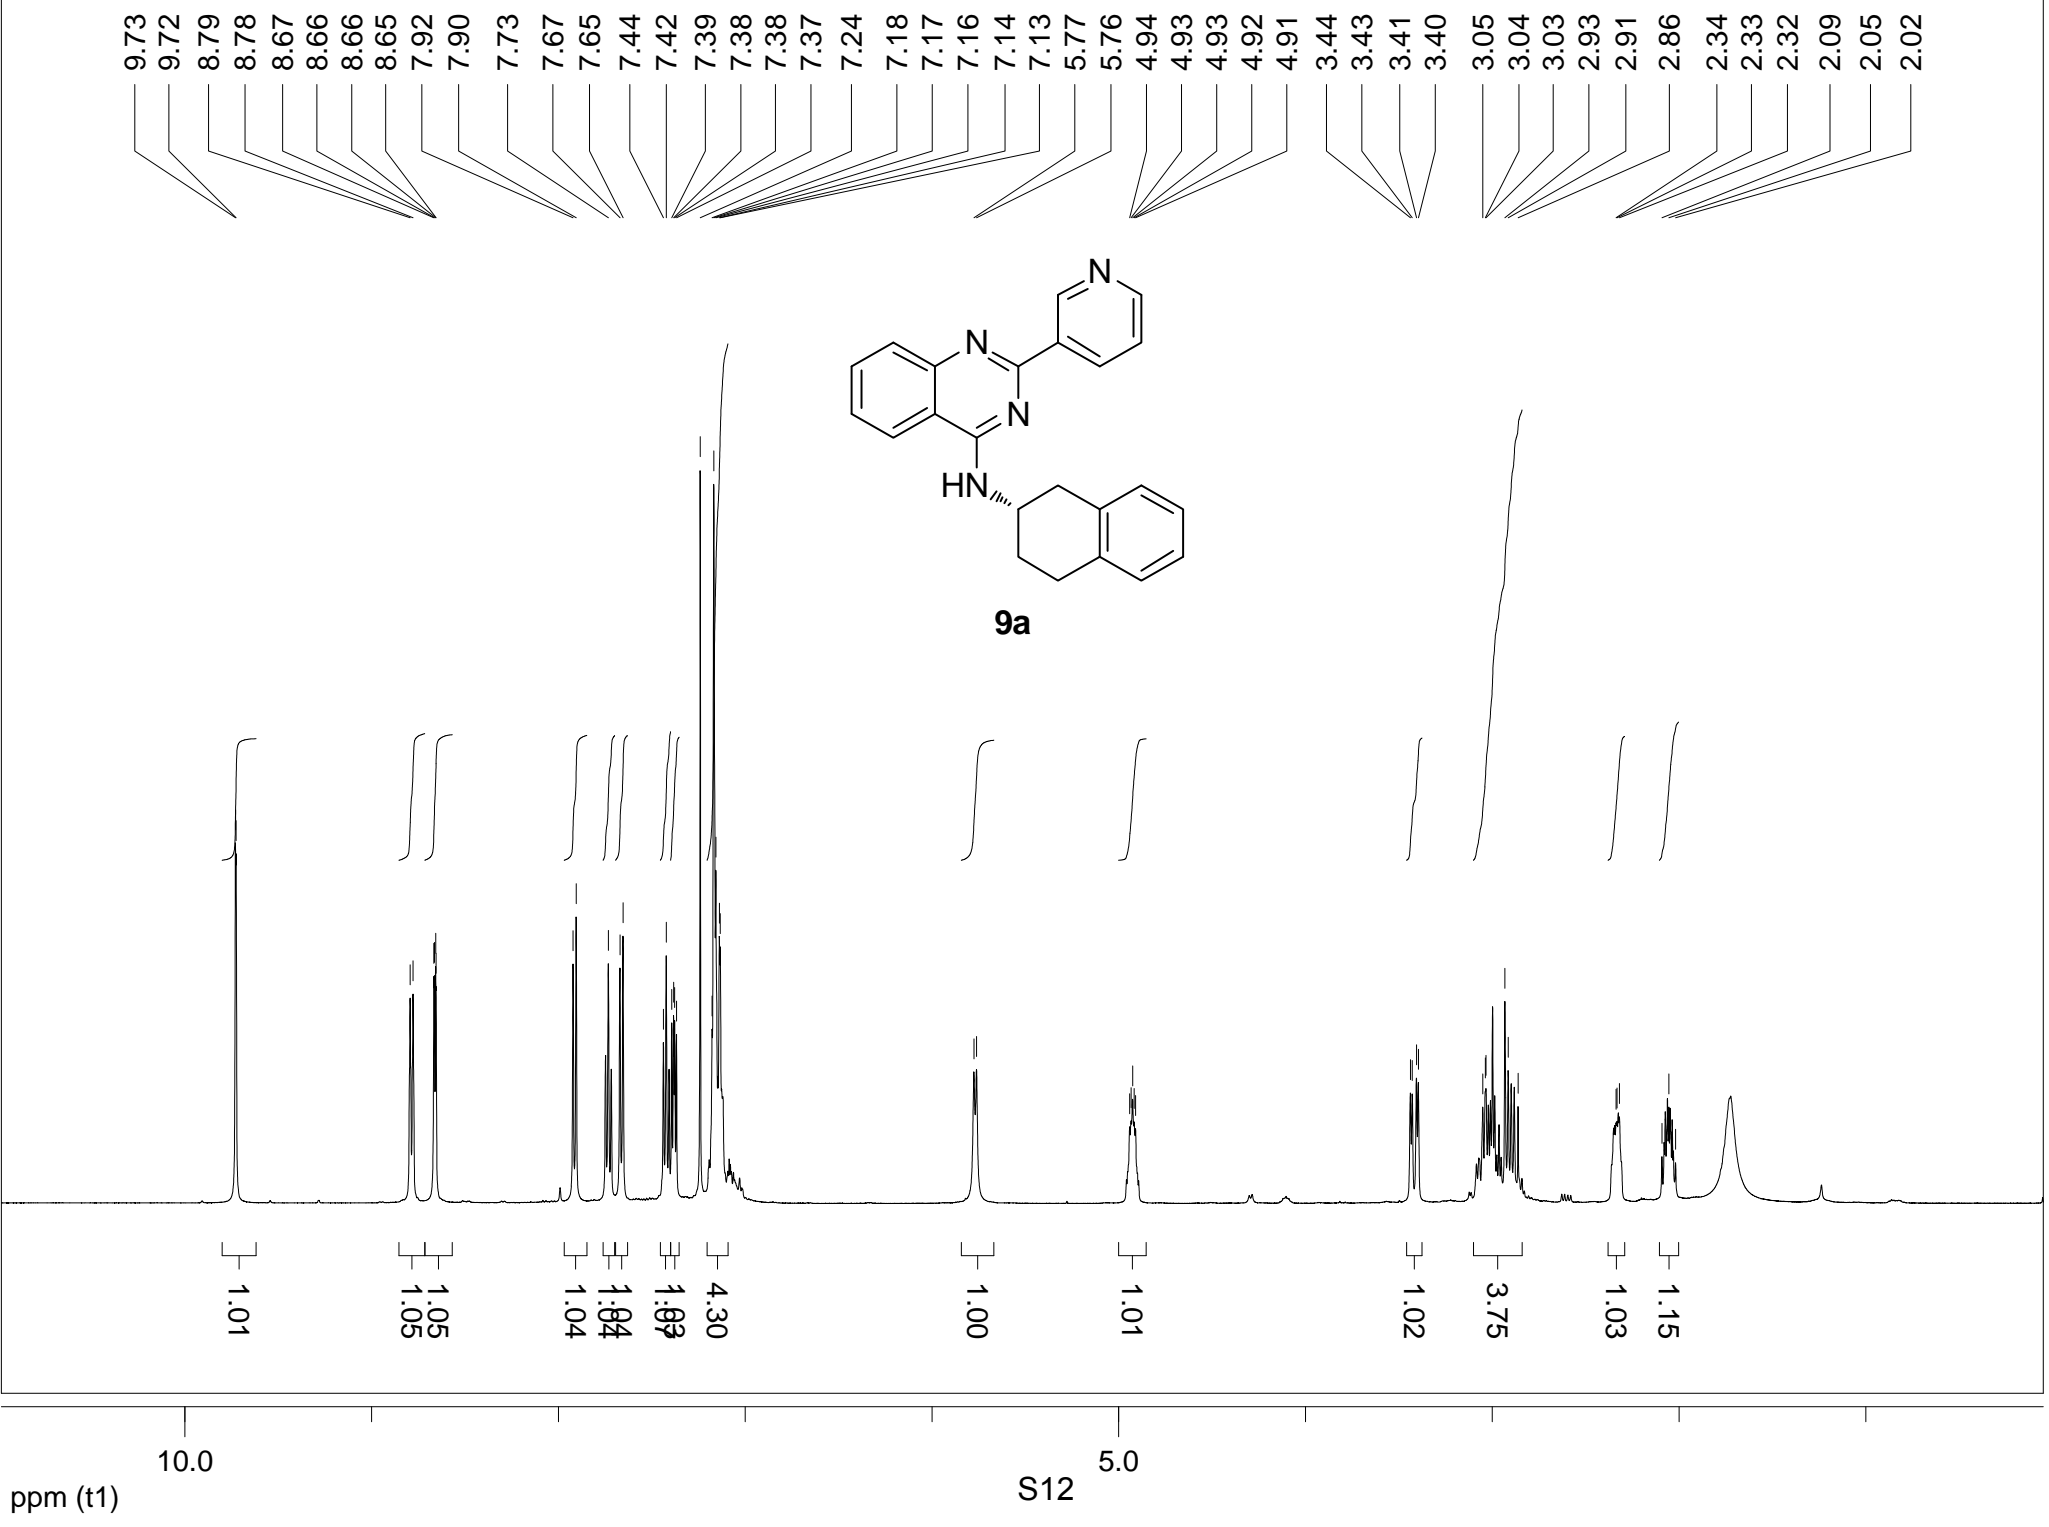

159.3  
158.8  
150.9  
150.5  
150.4  
135.8  
134.5  
134.3  
132.9  
129.8  
129.2  
129.1  
126.5  
126.3  
126.0  
123.3  
120.7  
114.0

77.5  
77.2  
76.9

47.1

35.9

28.6  
27.5

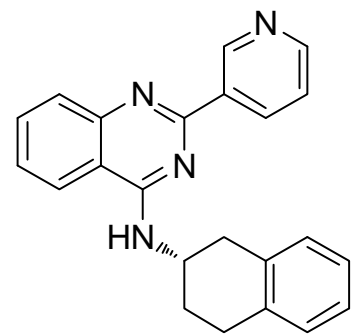

9a

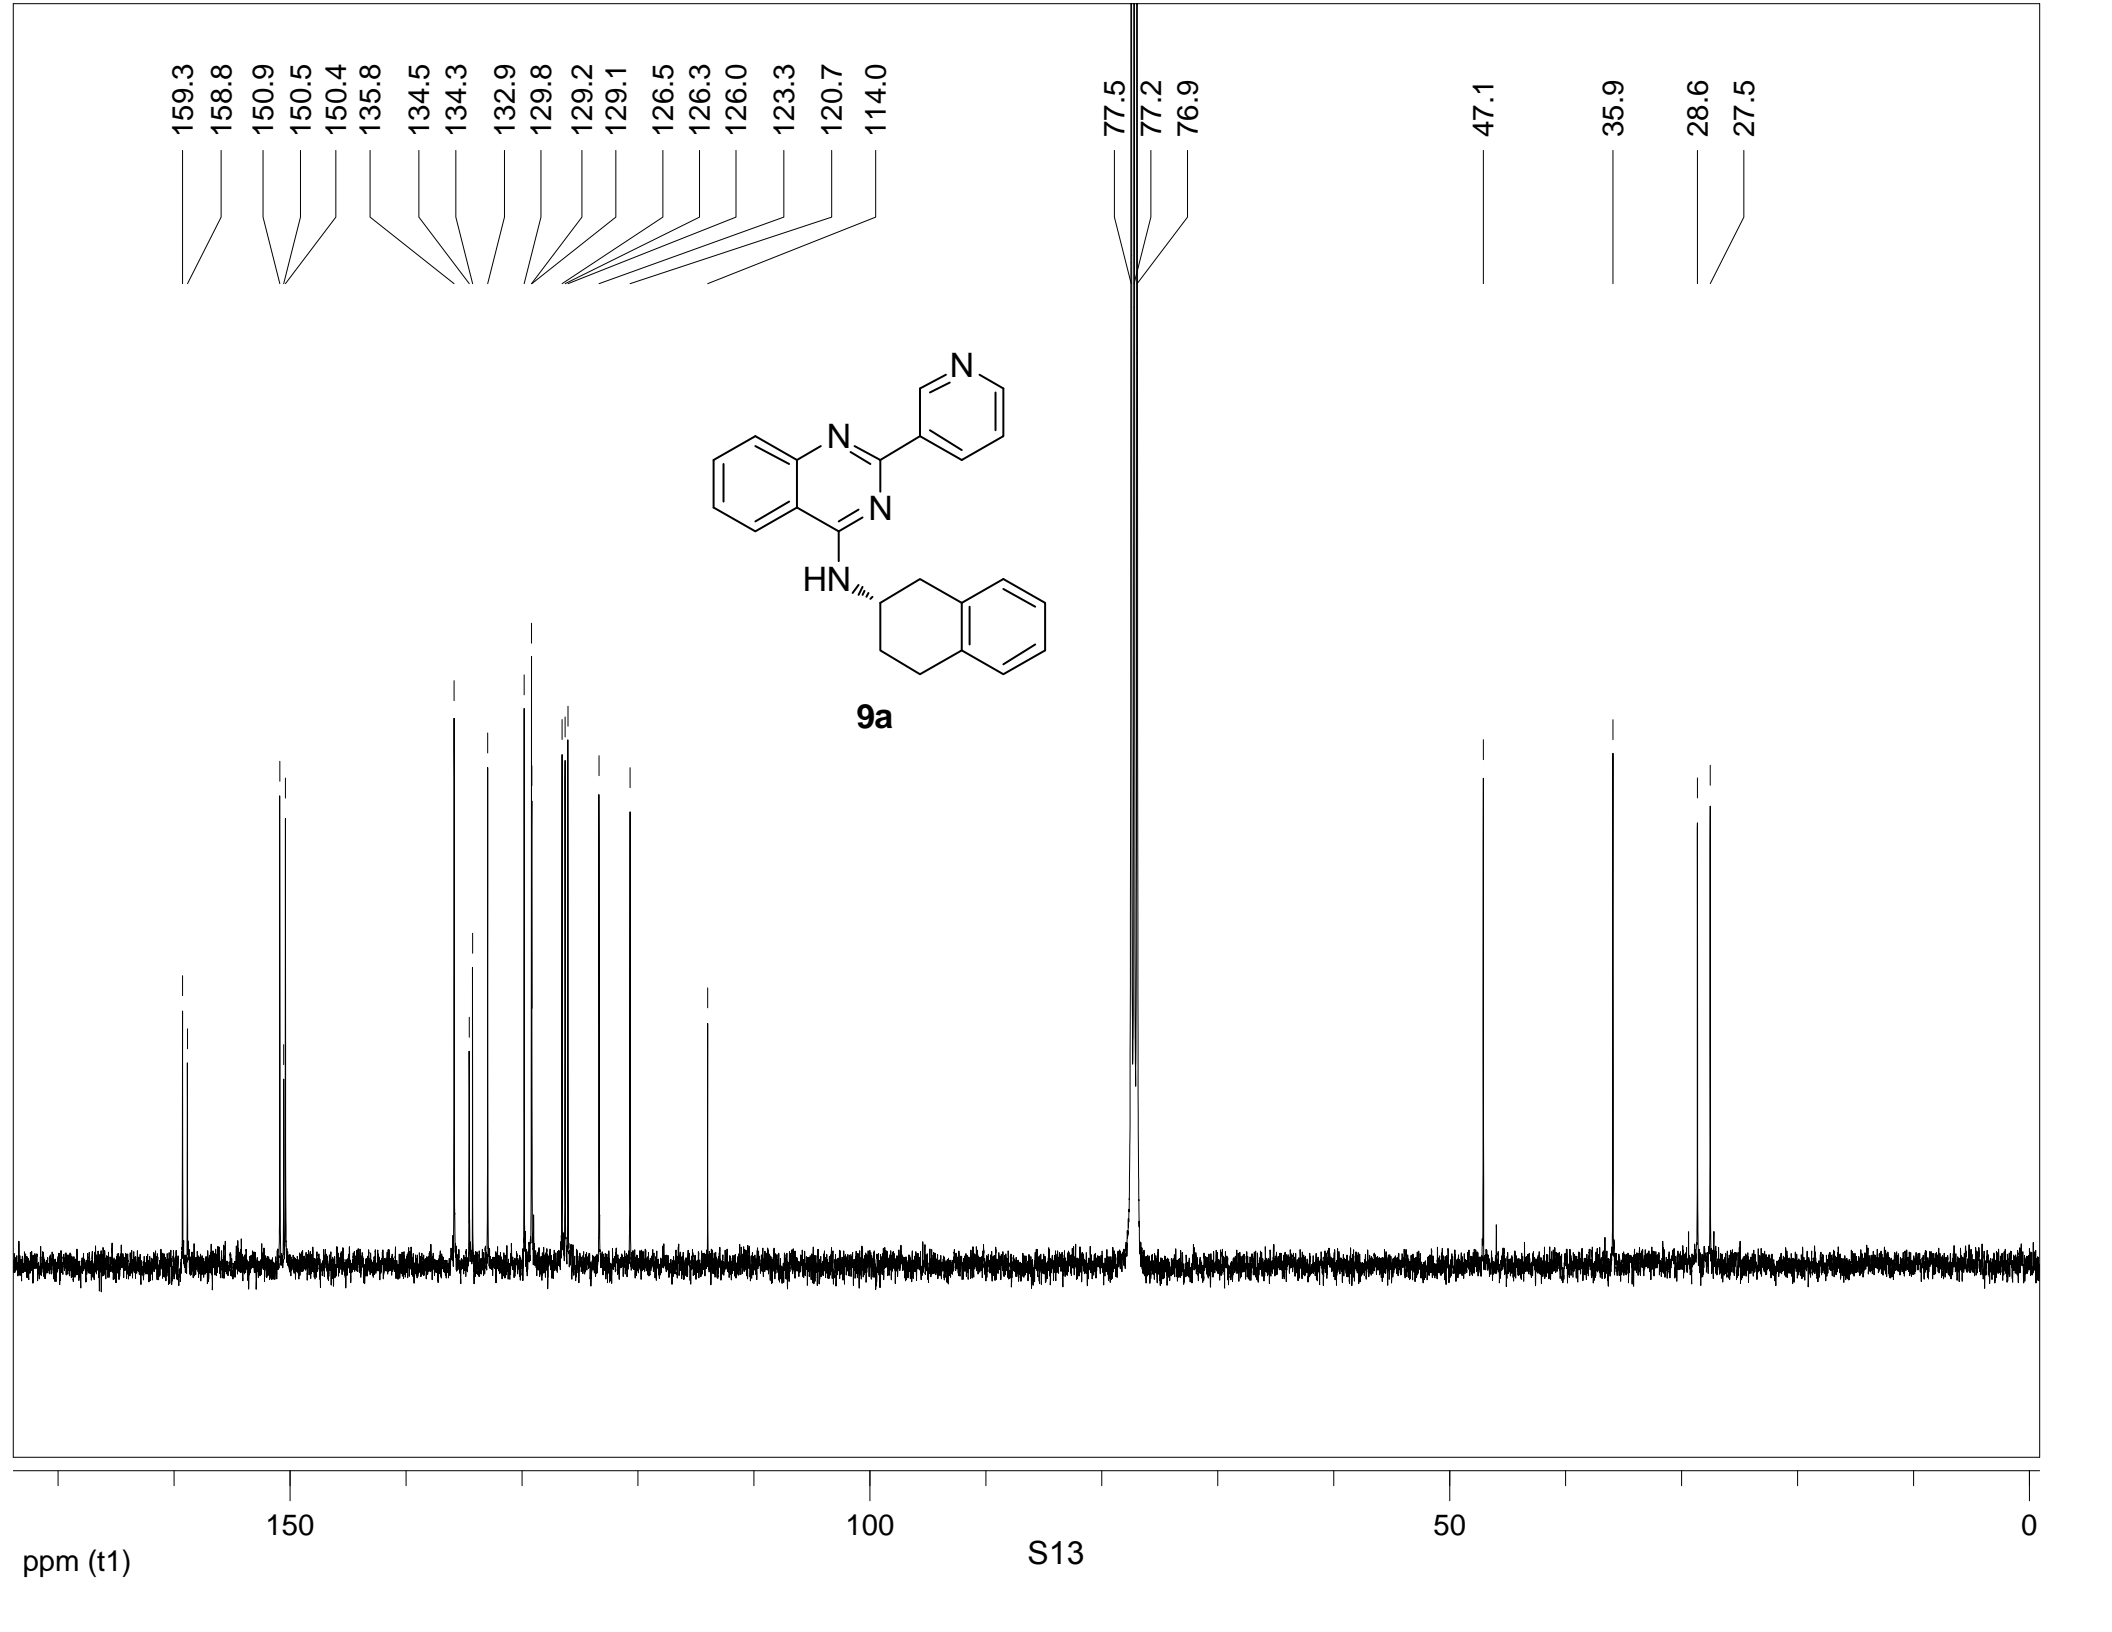

ppm (t1)

150

100

S13

50

0

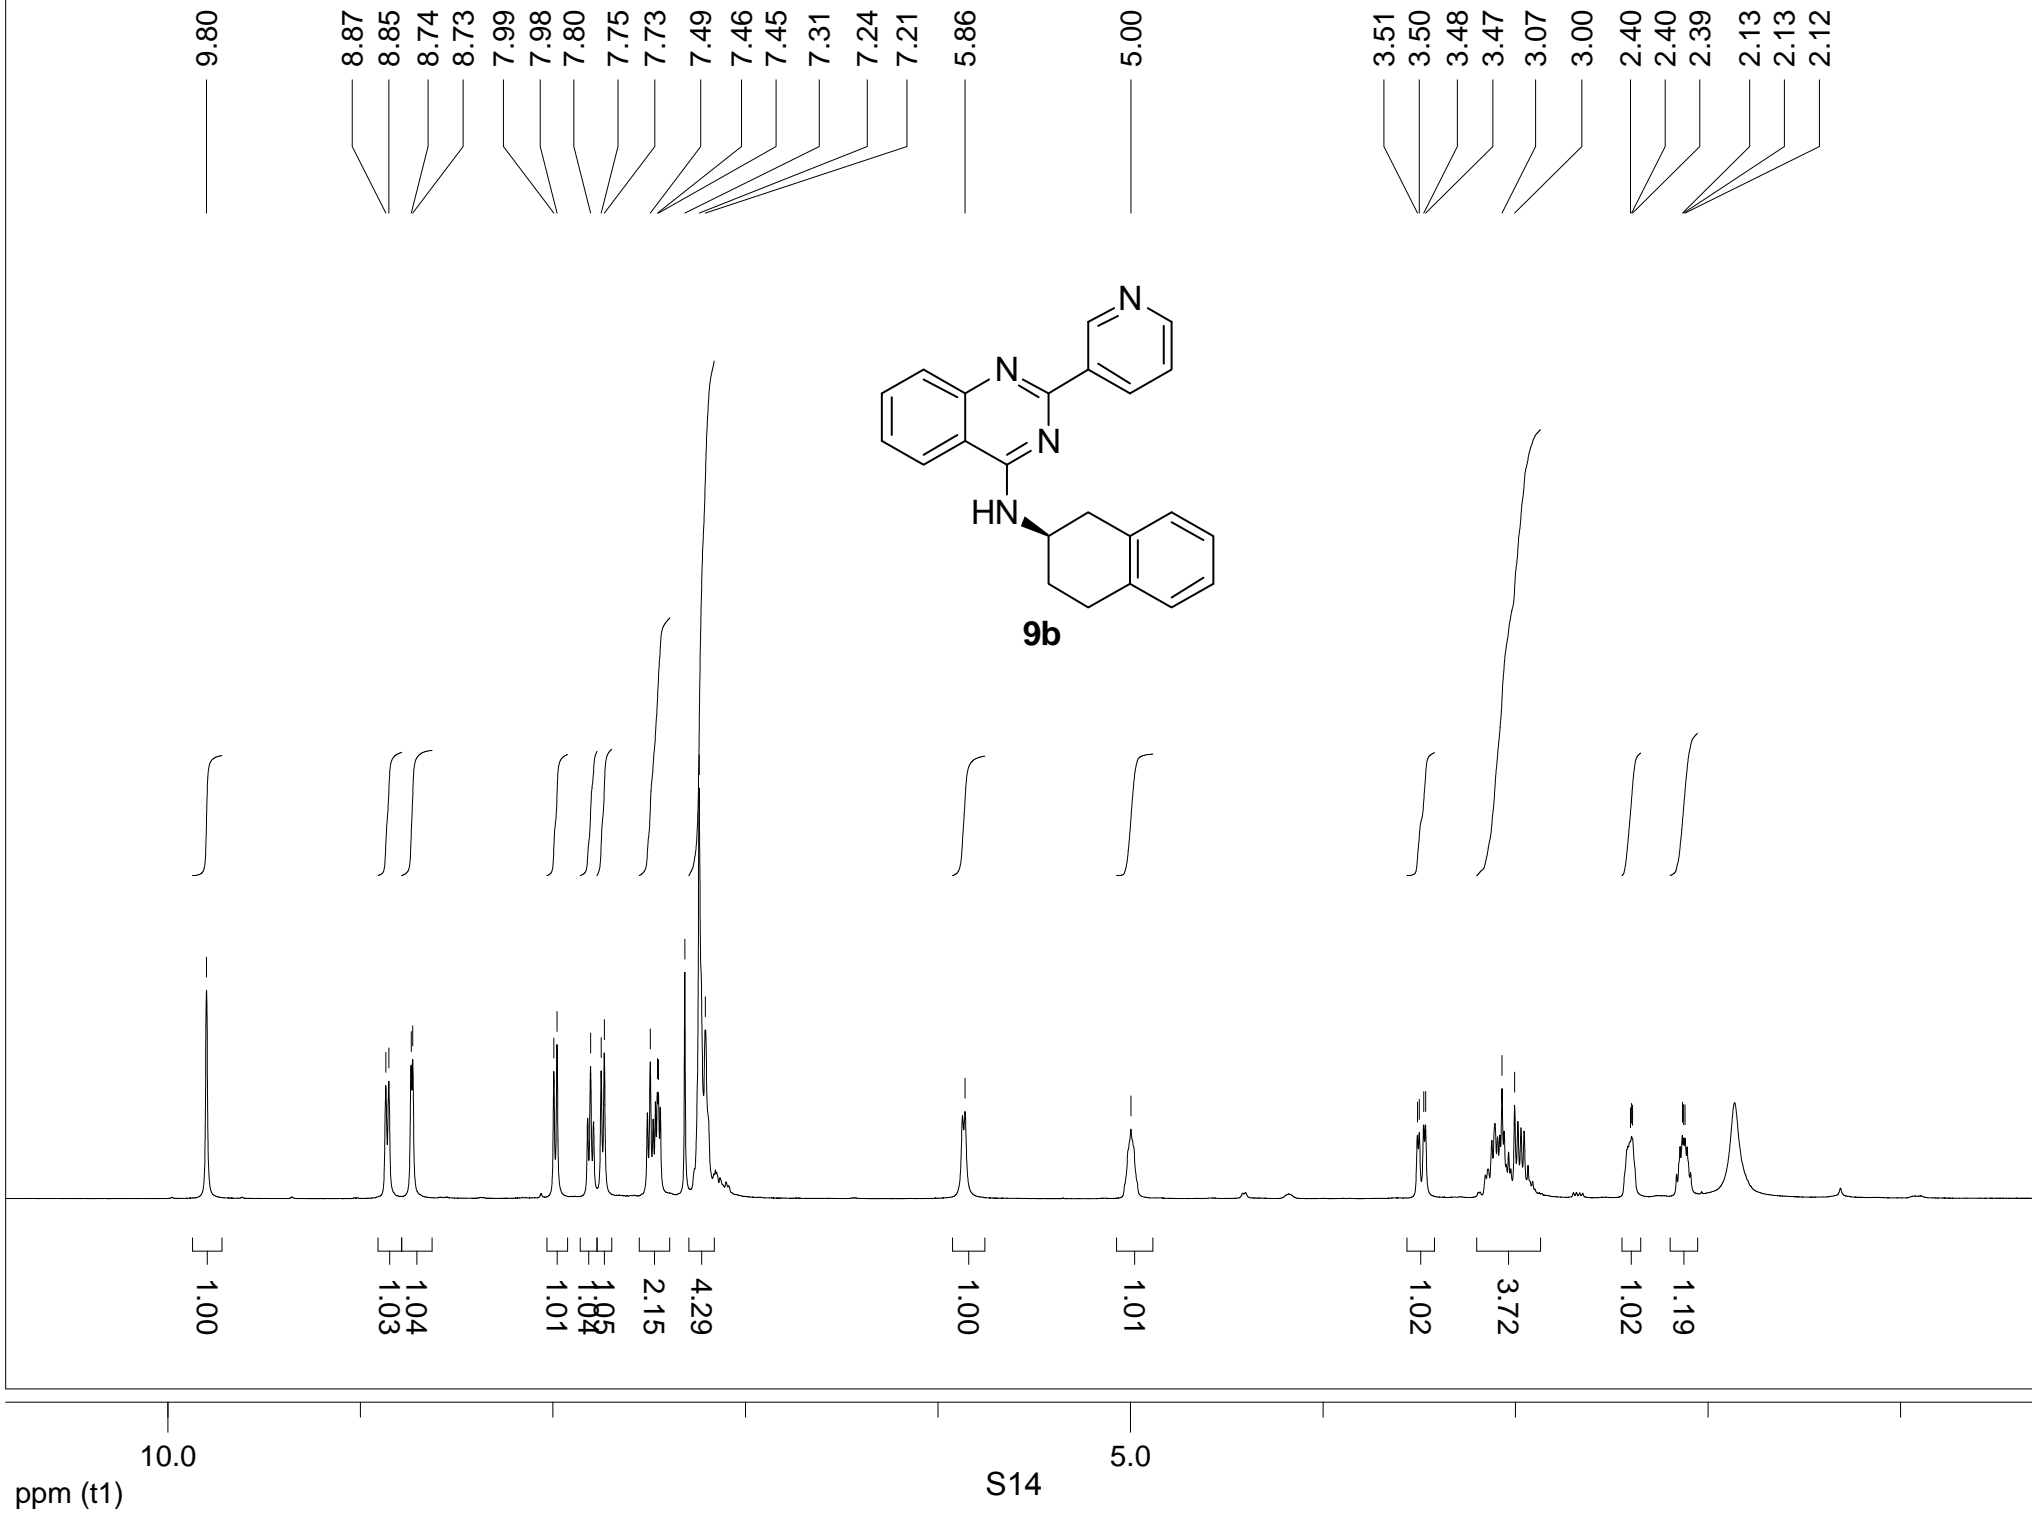

159.3  
158.8  
150.8  
150.5  
150.4  
135.9  
135.8  
134.5  
134.3  
132.9  
129.8  
129.2  
129.1  
126.5  
126.3  
126.0  
123.3  
120.7  
114.0

77.5  
77.2  
76.9

47.1

35.9

28.6  
27.5

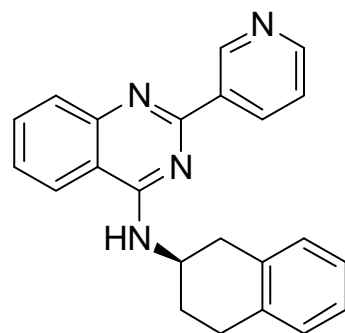

9b

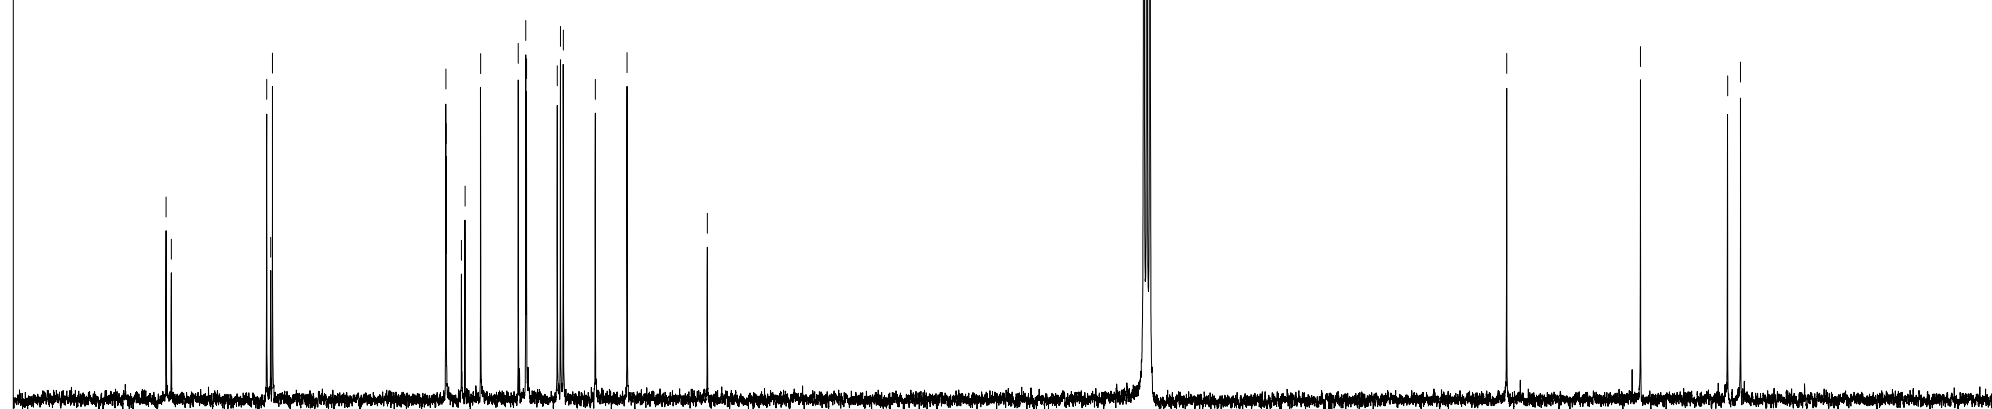

ppm (t1)

S15

50

150

100

9.78 9.78 8.85 8.84 8.83 8.83 8.69 8.68 7.94 7.92 7.75 7.74 7.72 7.69 7.67 7.44 7.43 7.42 7.41 7.40 7.31 7.30 7.29 7.26 7.25 7.24 7.23 7.23 7.22 6.04 5.36 5.35 5.34 5.32 5.31 5.30 3.62 3.61 3.59 3.58 3.11 3.10 3.07 3.06

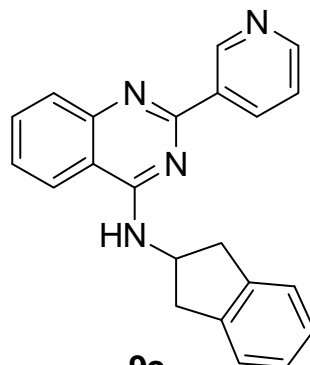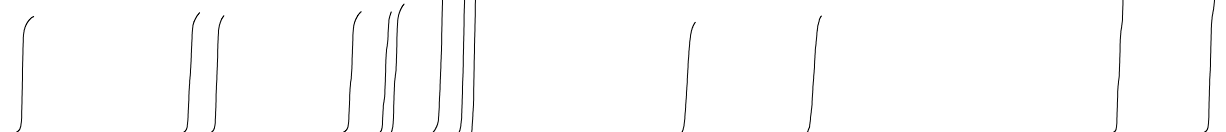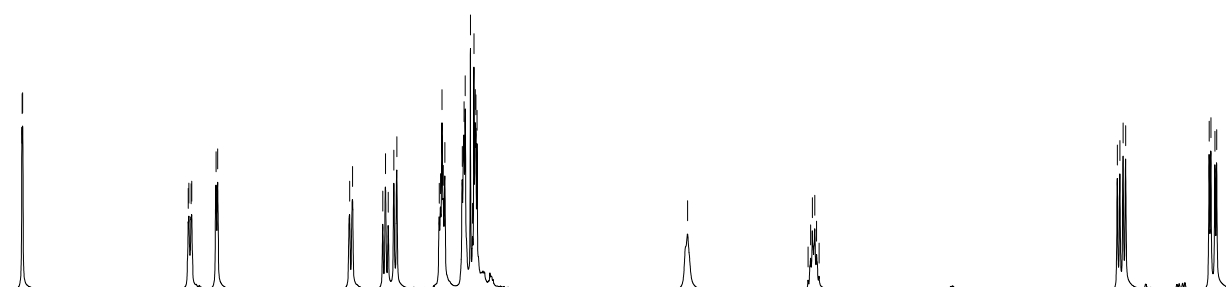

0.97 1.00 1.01 1.07 2.09 2.08 0.92 0.97 2.00 2.05

ppm (t1) 10.0 5.0 S16



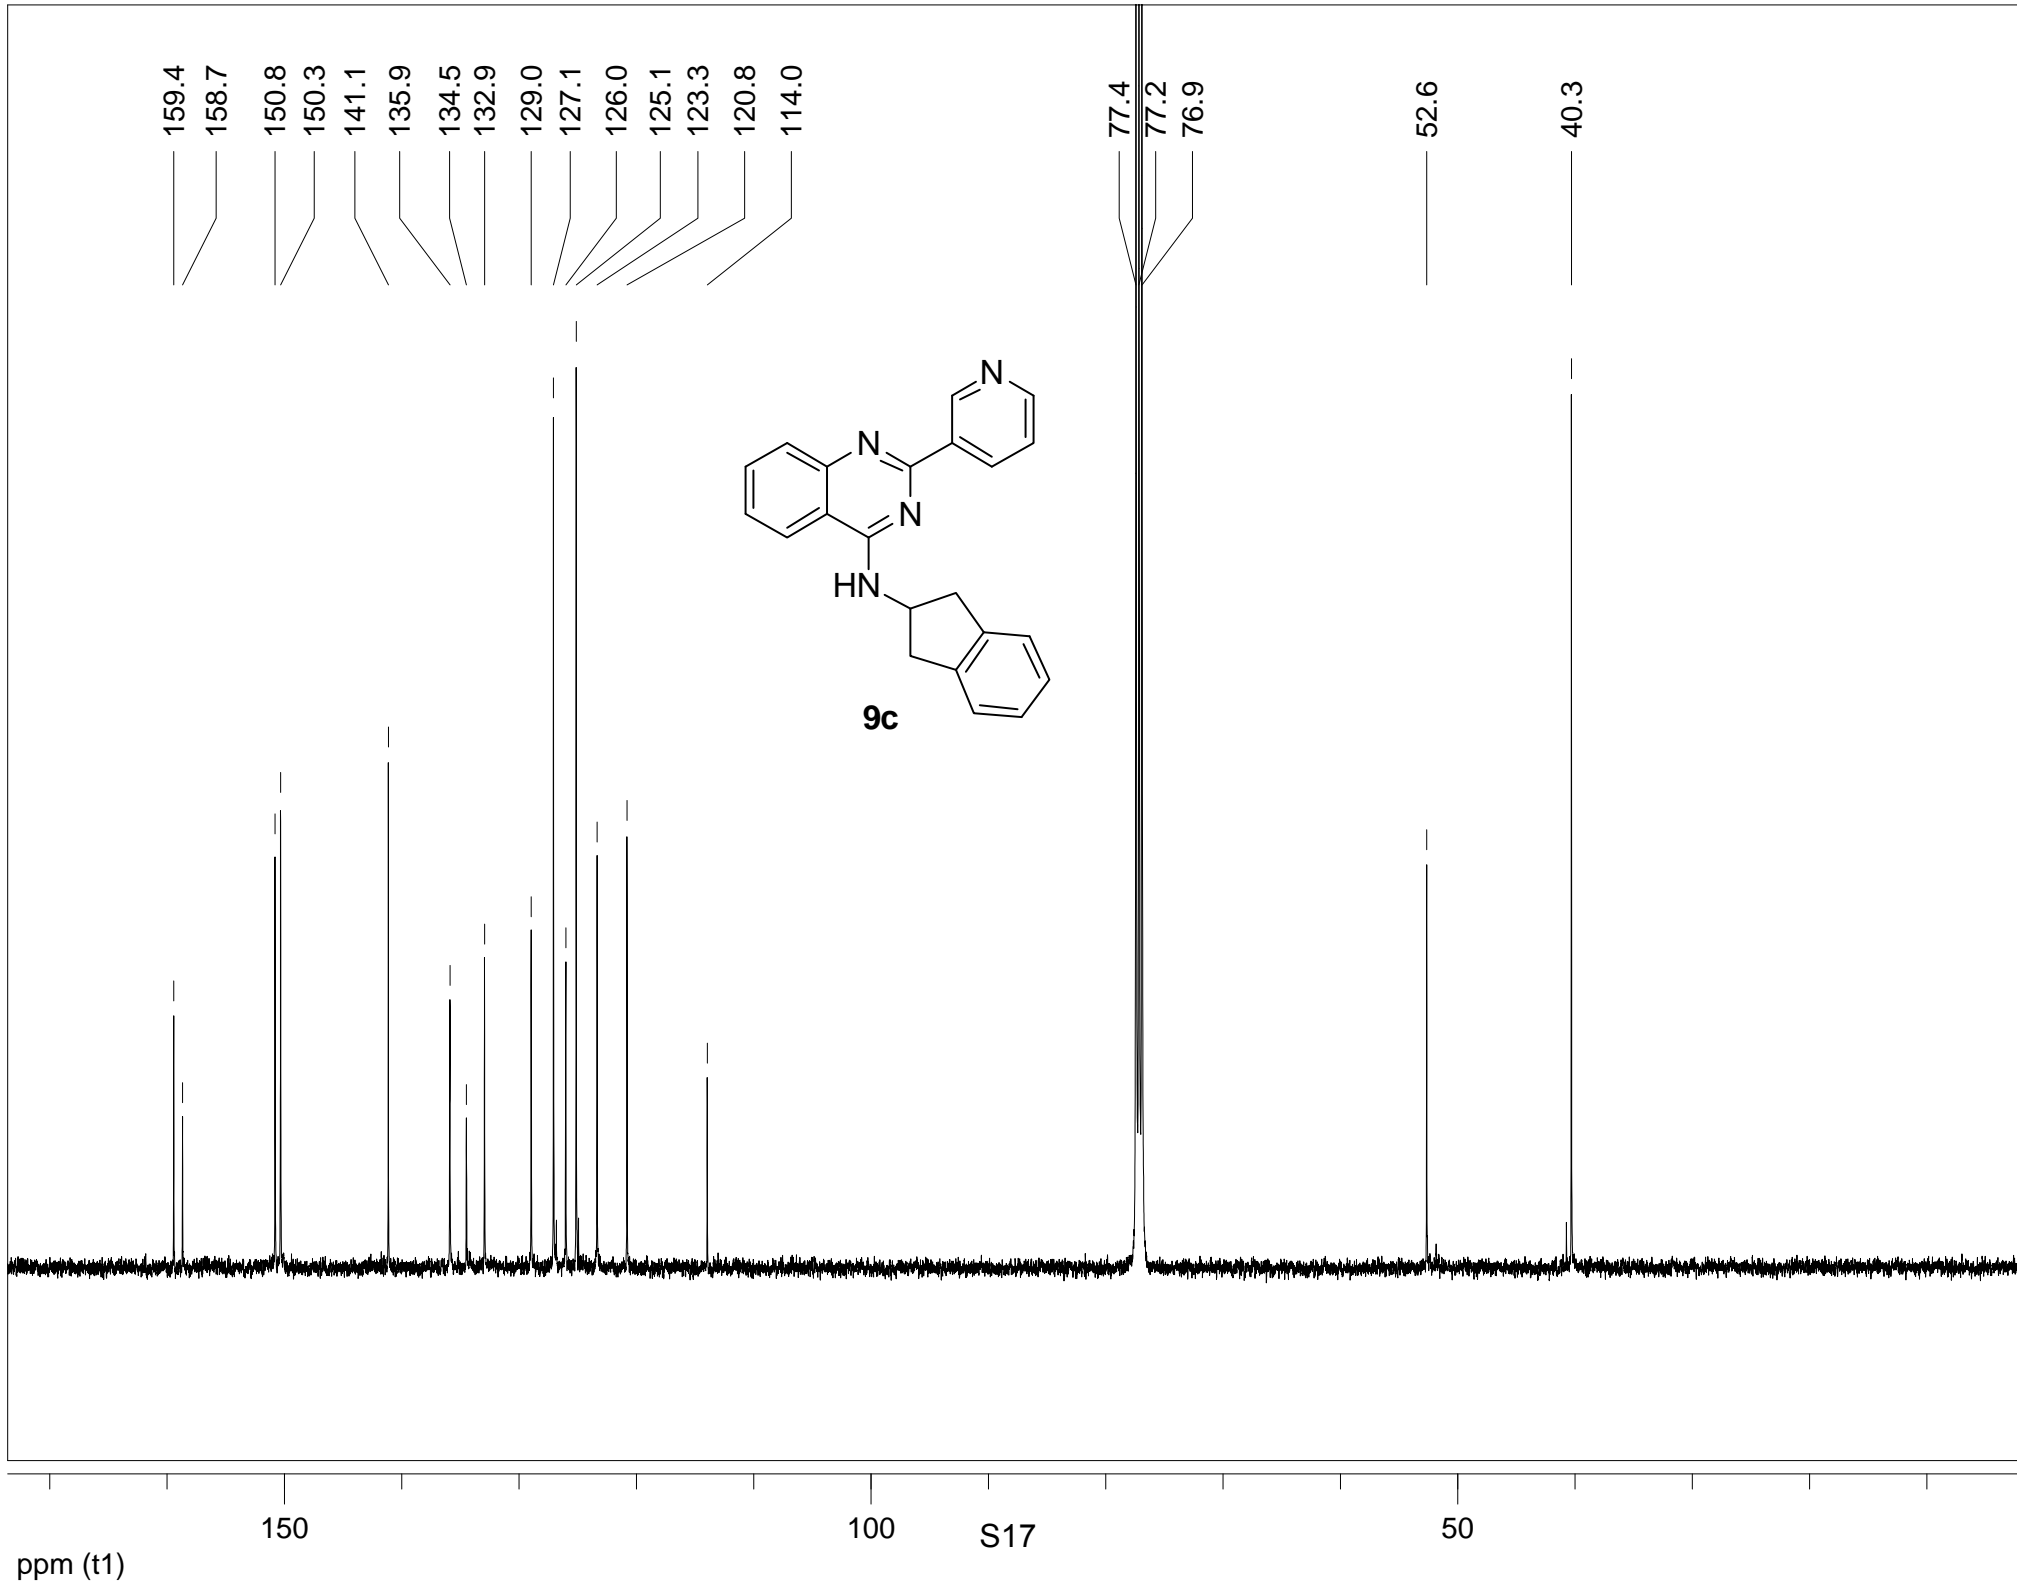

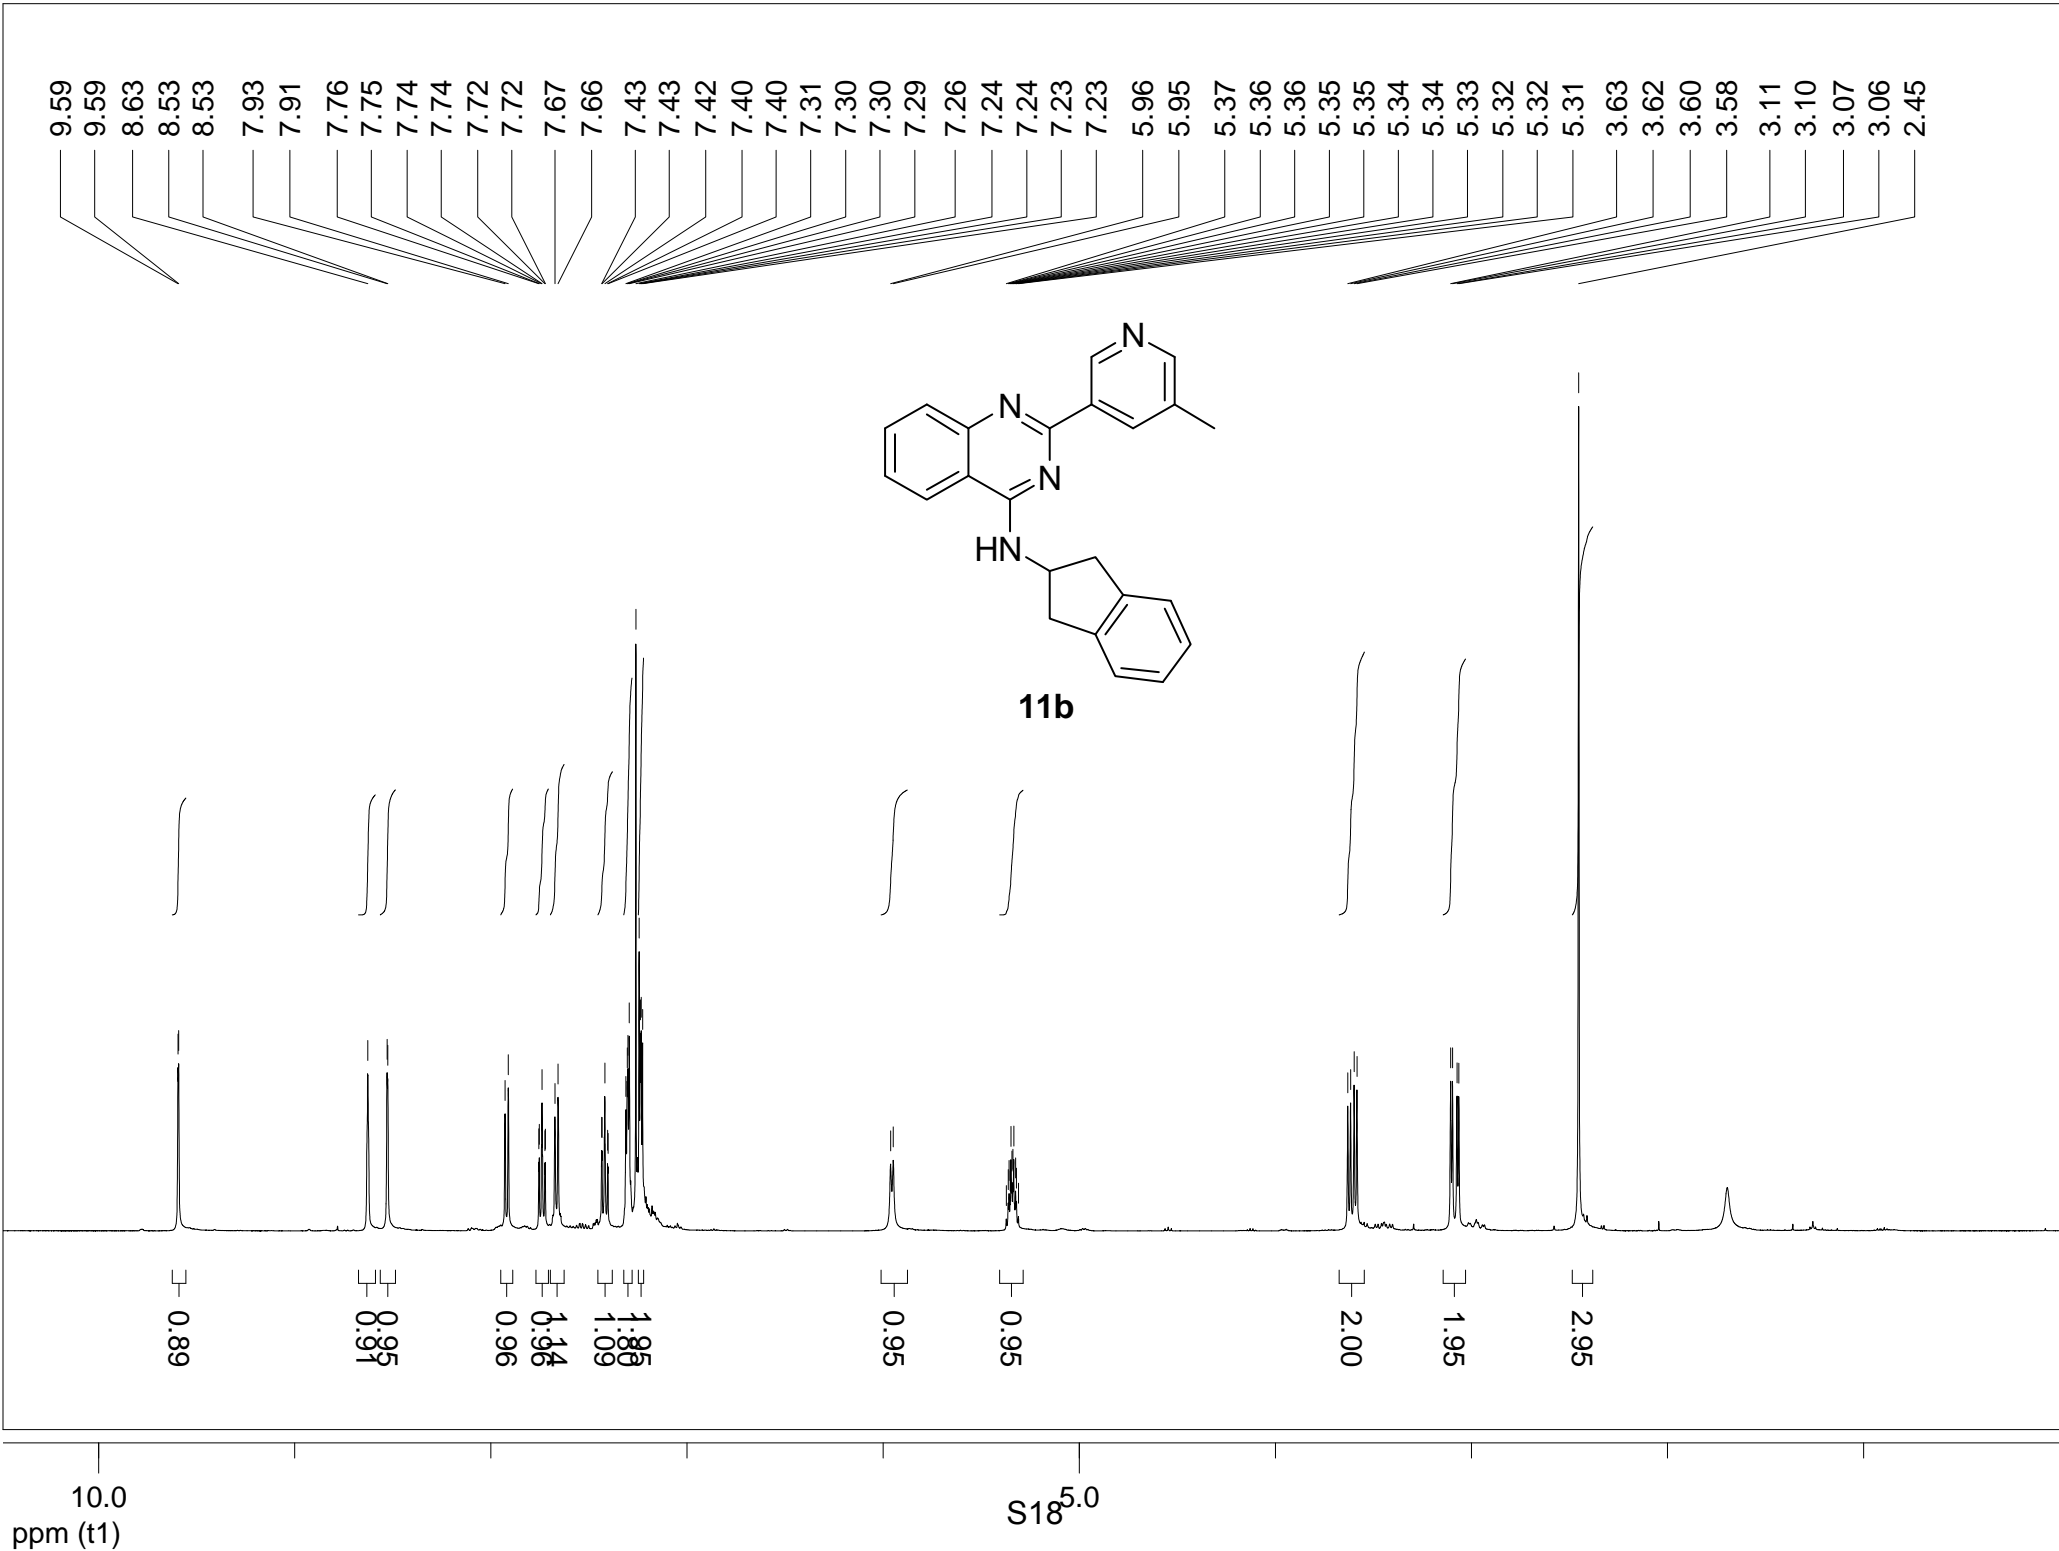

159.5  
158.9  
151.3  
150.5  
147.7  
141.2  
136.1  
134.1  
132.8  
132.7  
128.9  
127.0  
125.8  
125.1  
121.0  
114.0

77.5  
77.2  
76.9

52.6

40.2

18.6

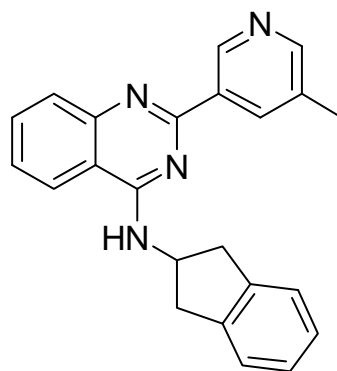

**11b**

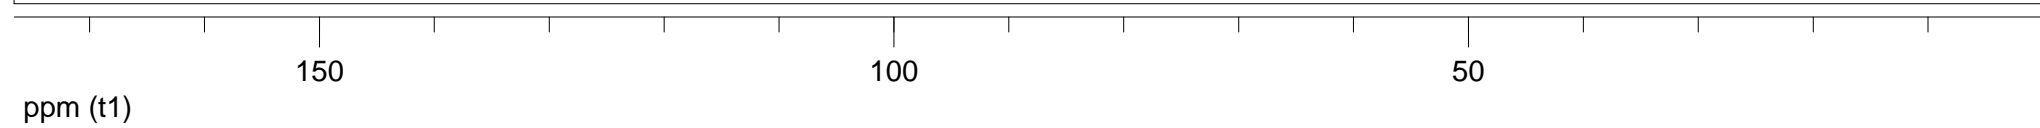

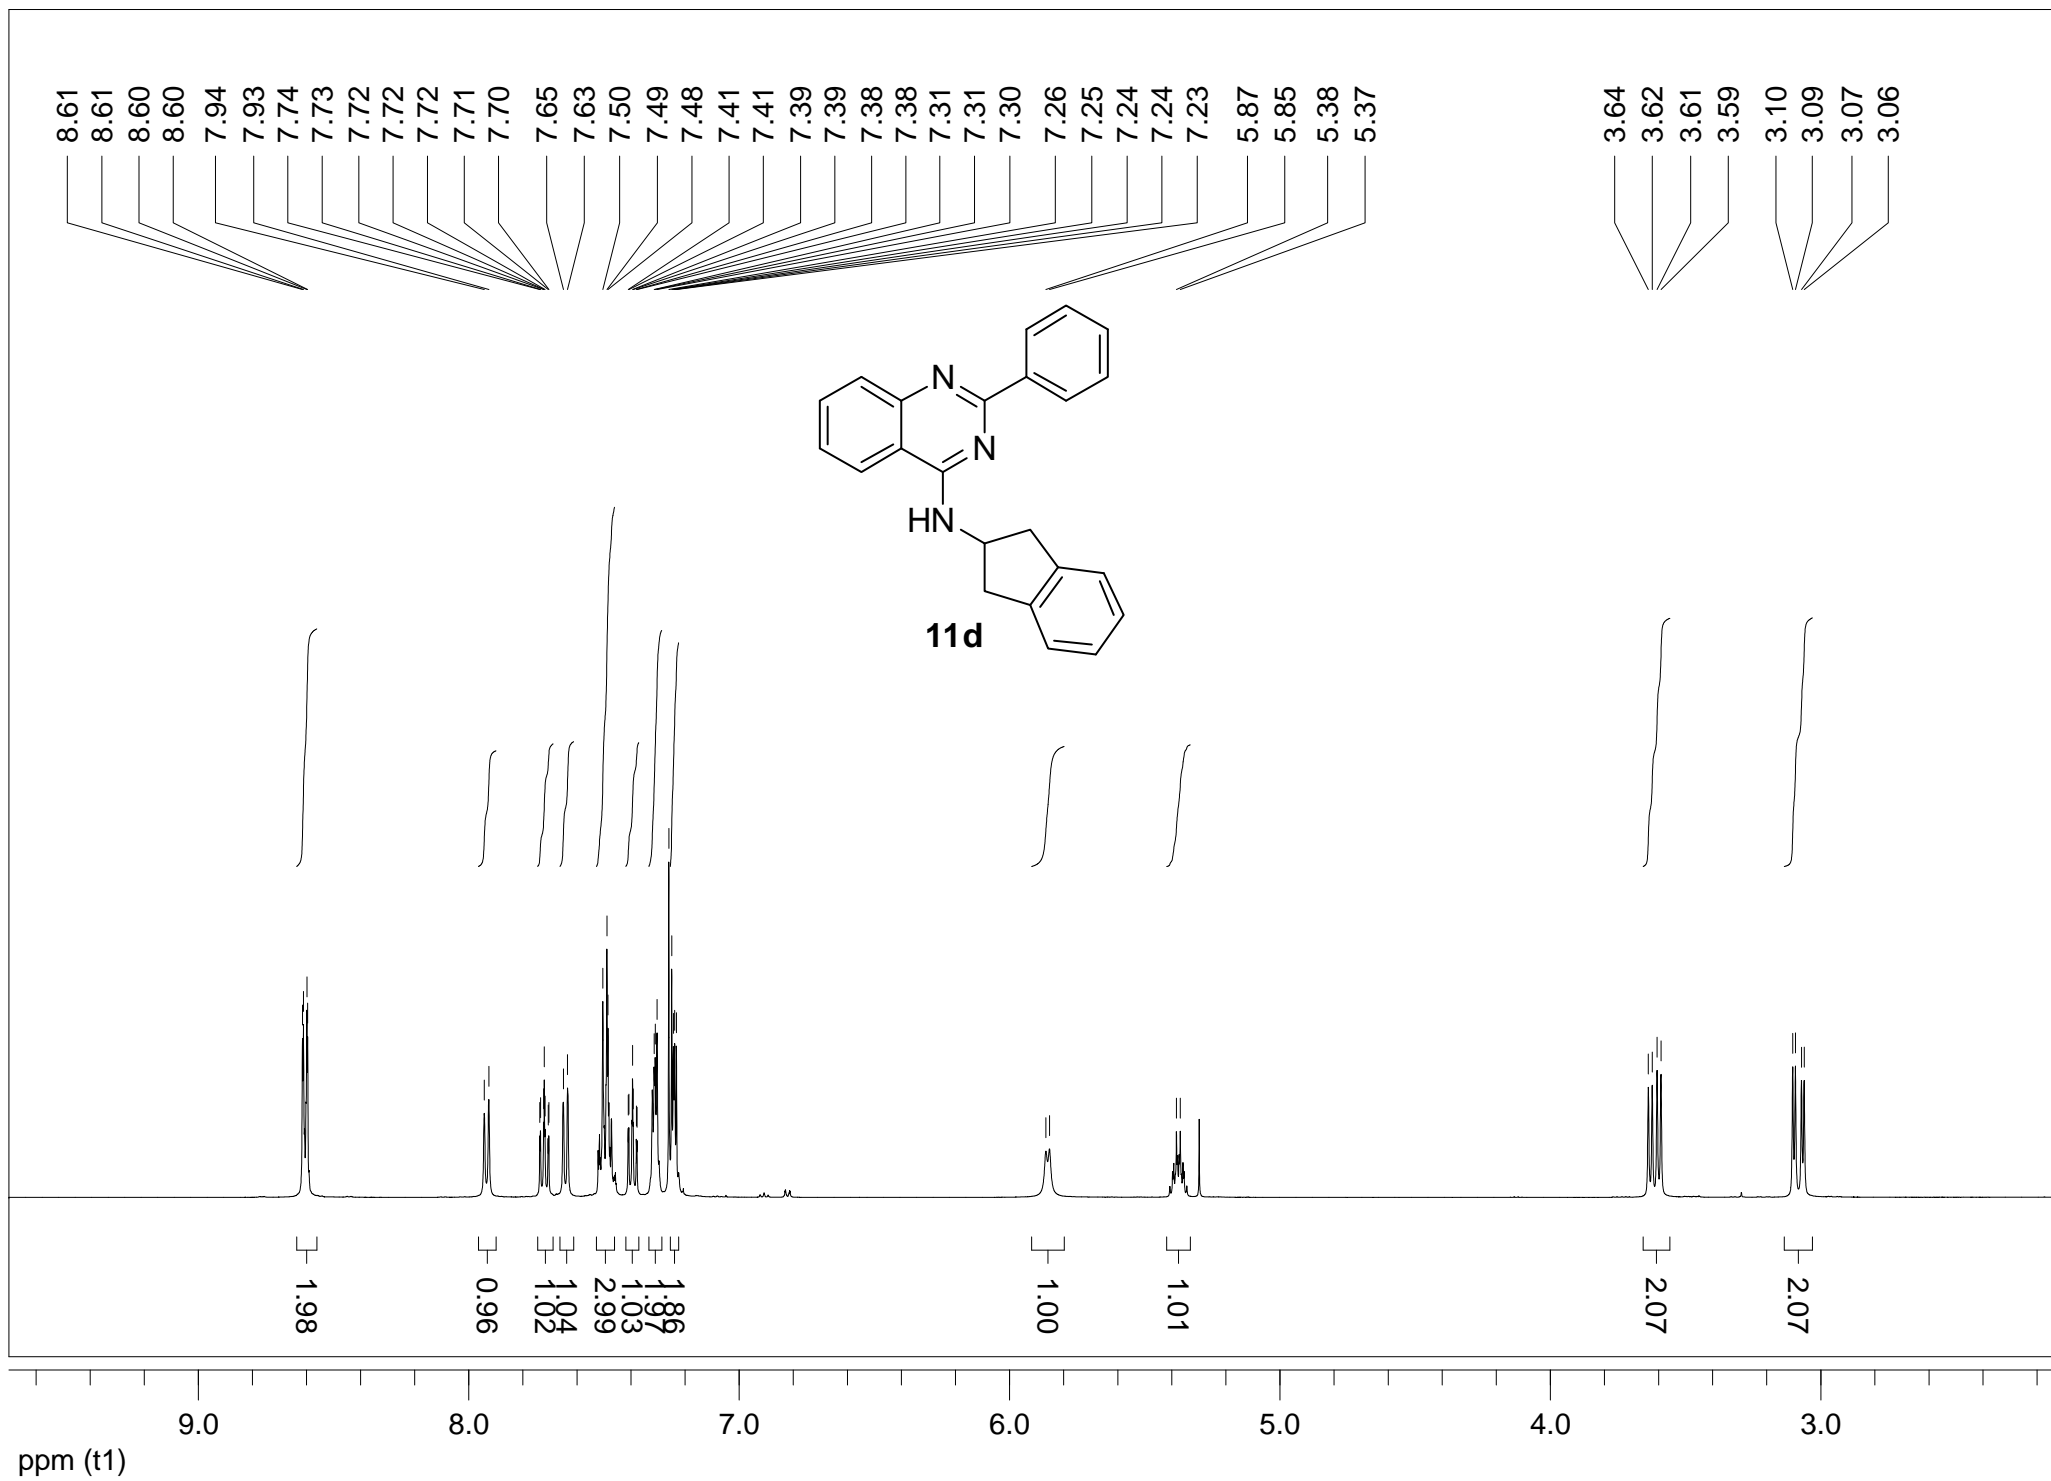

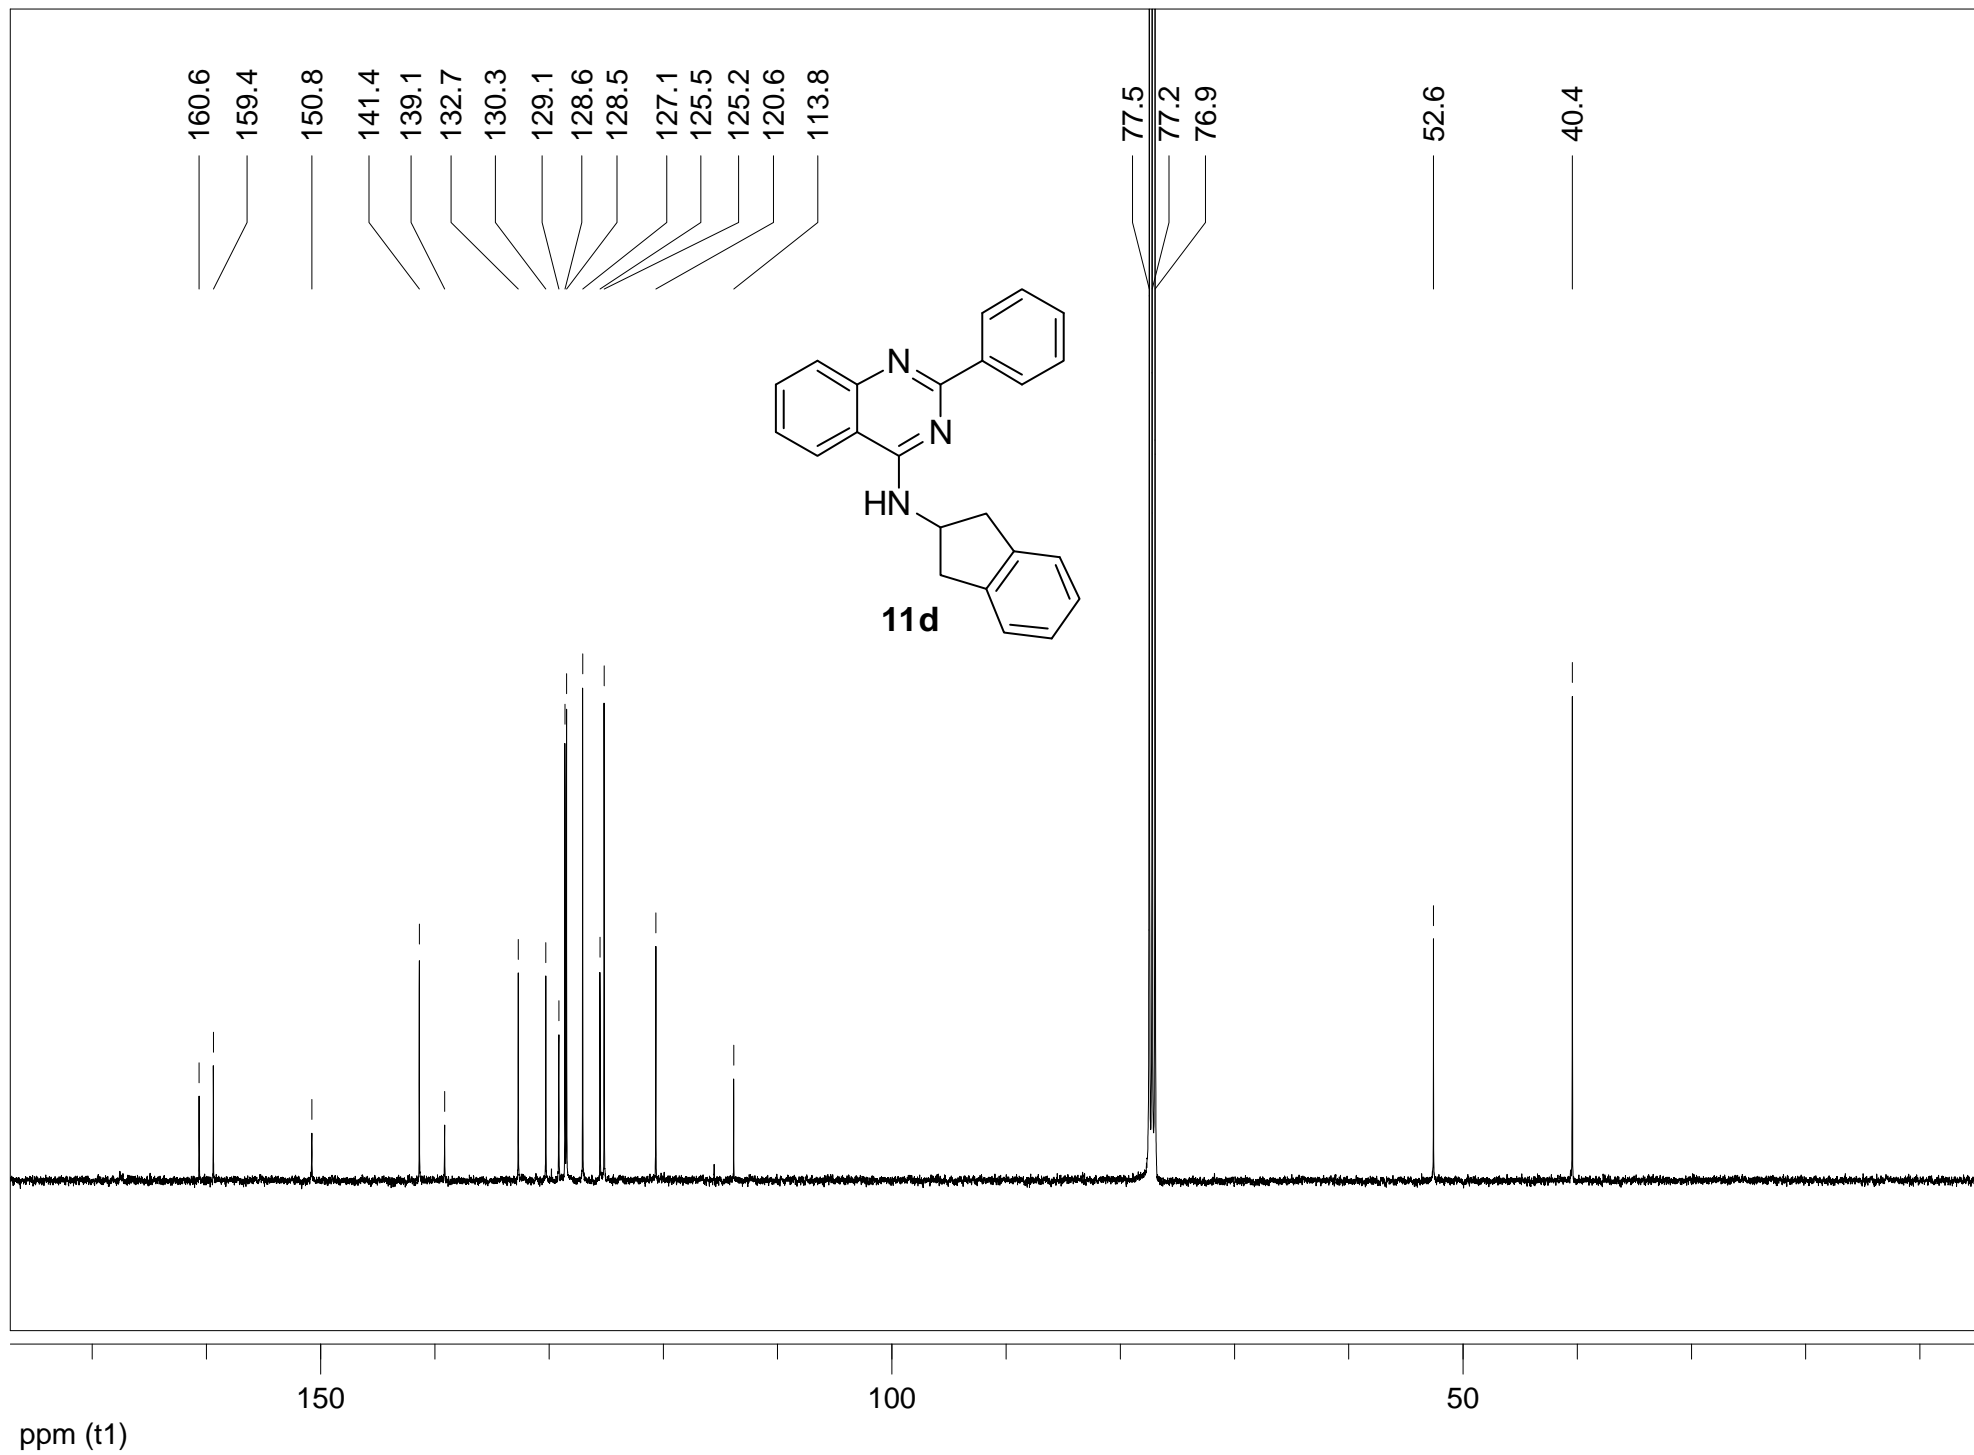

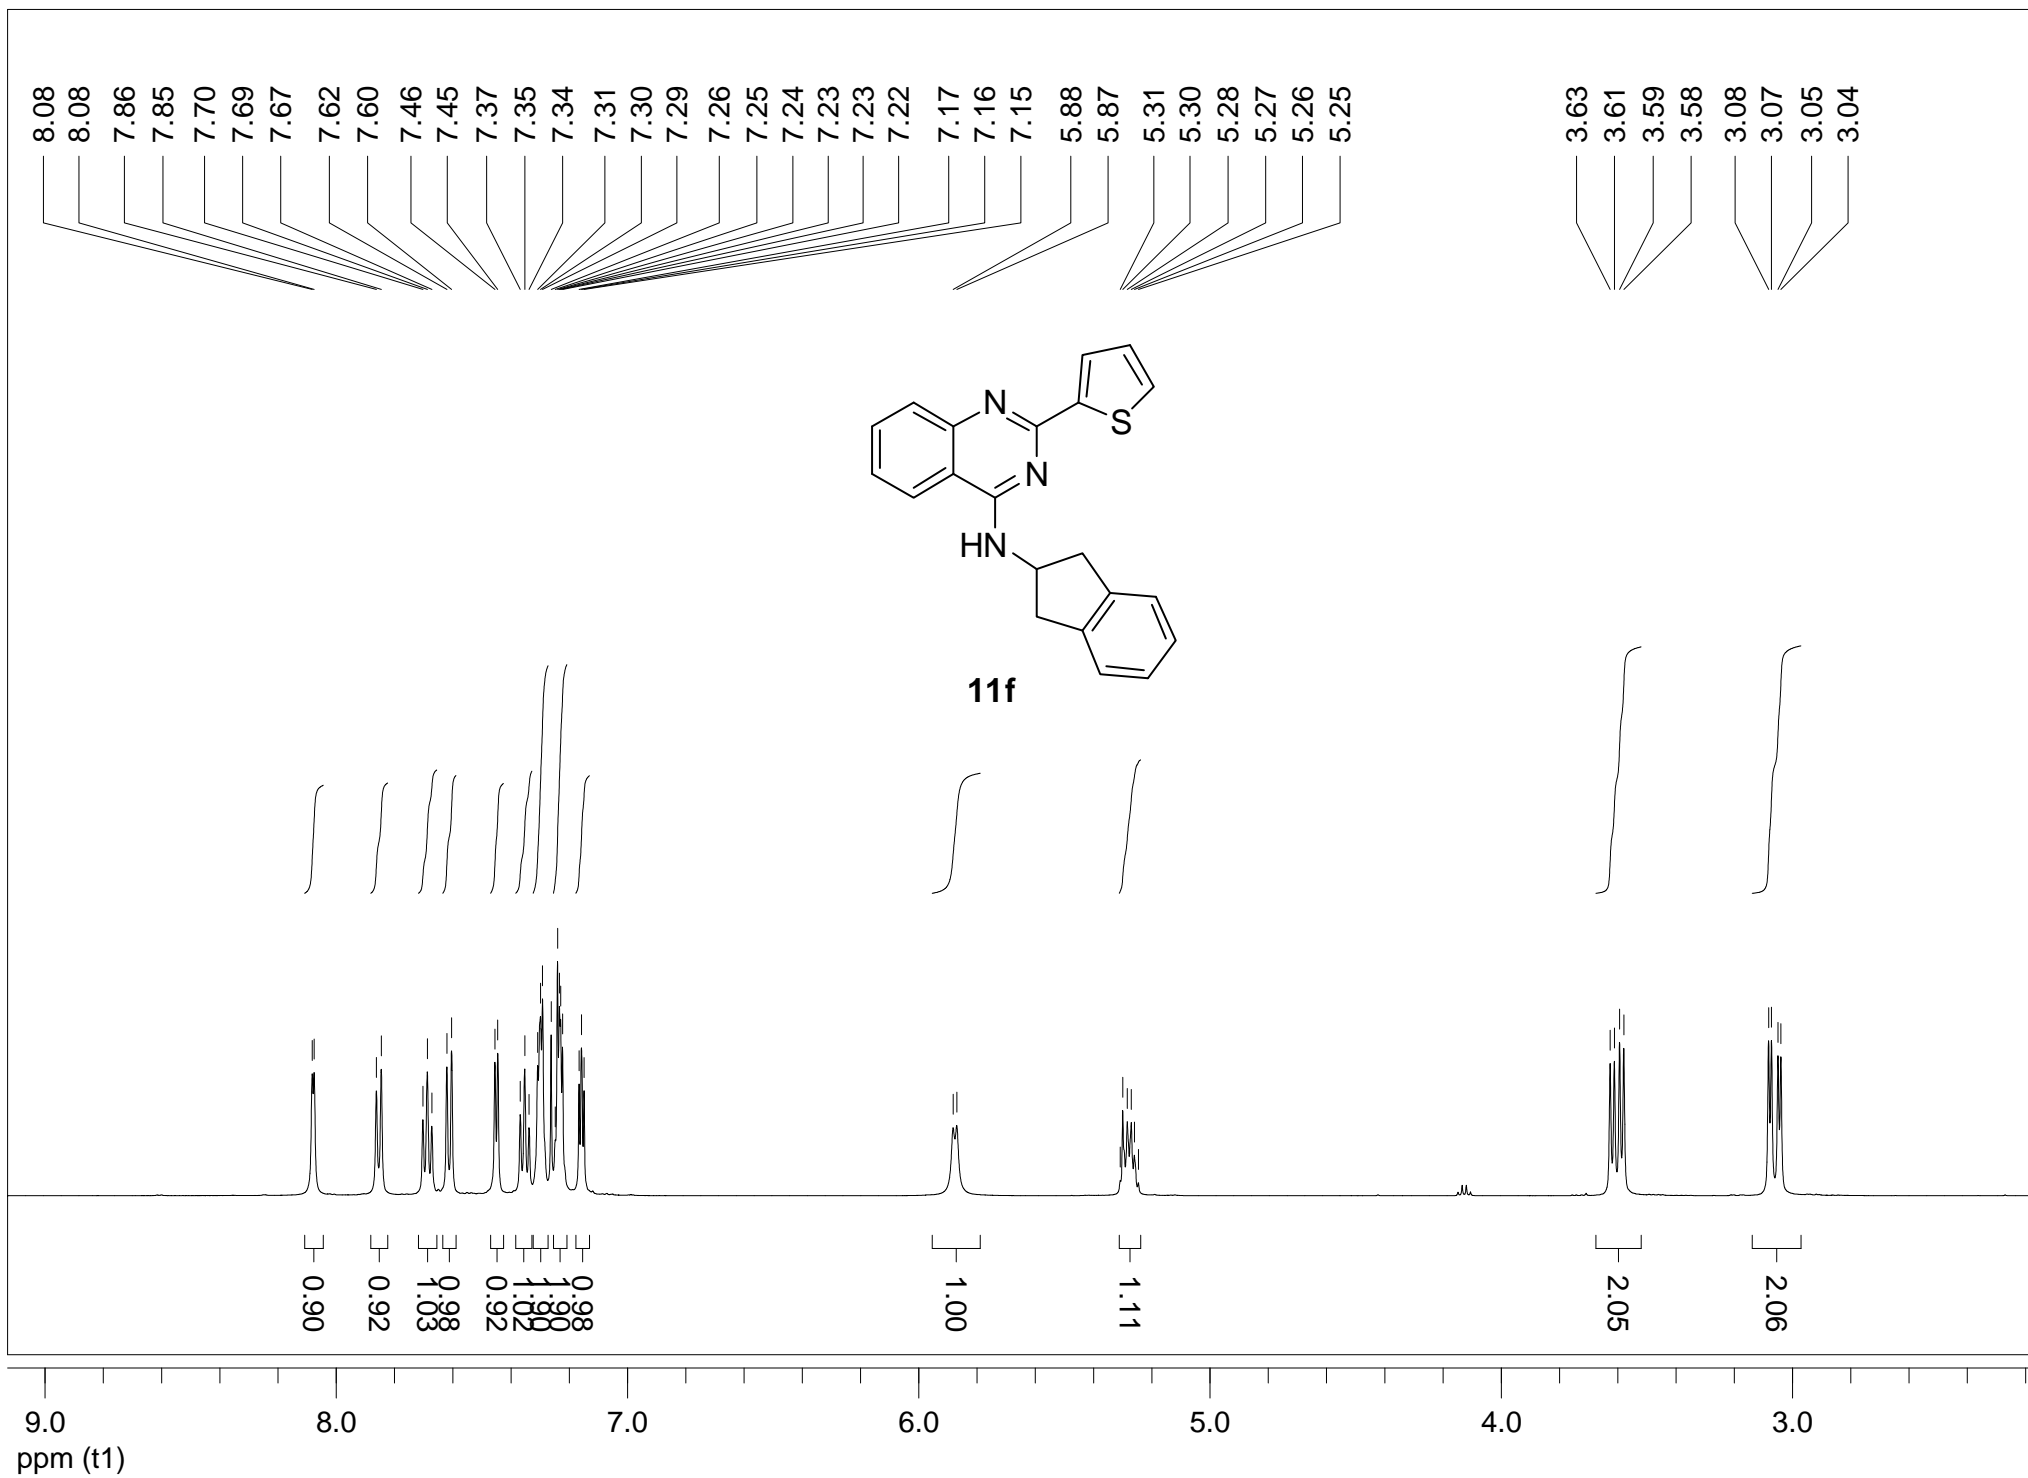

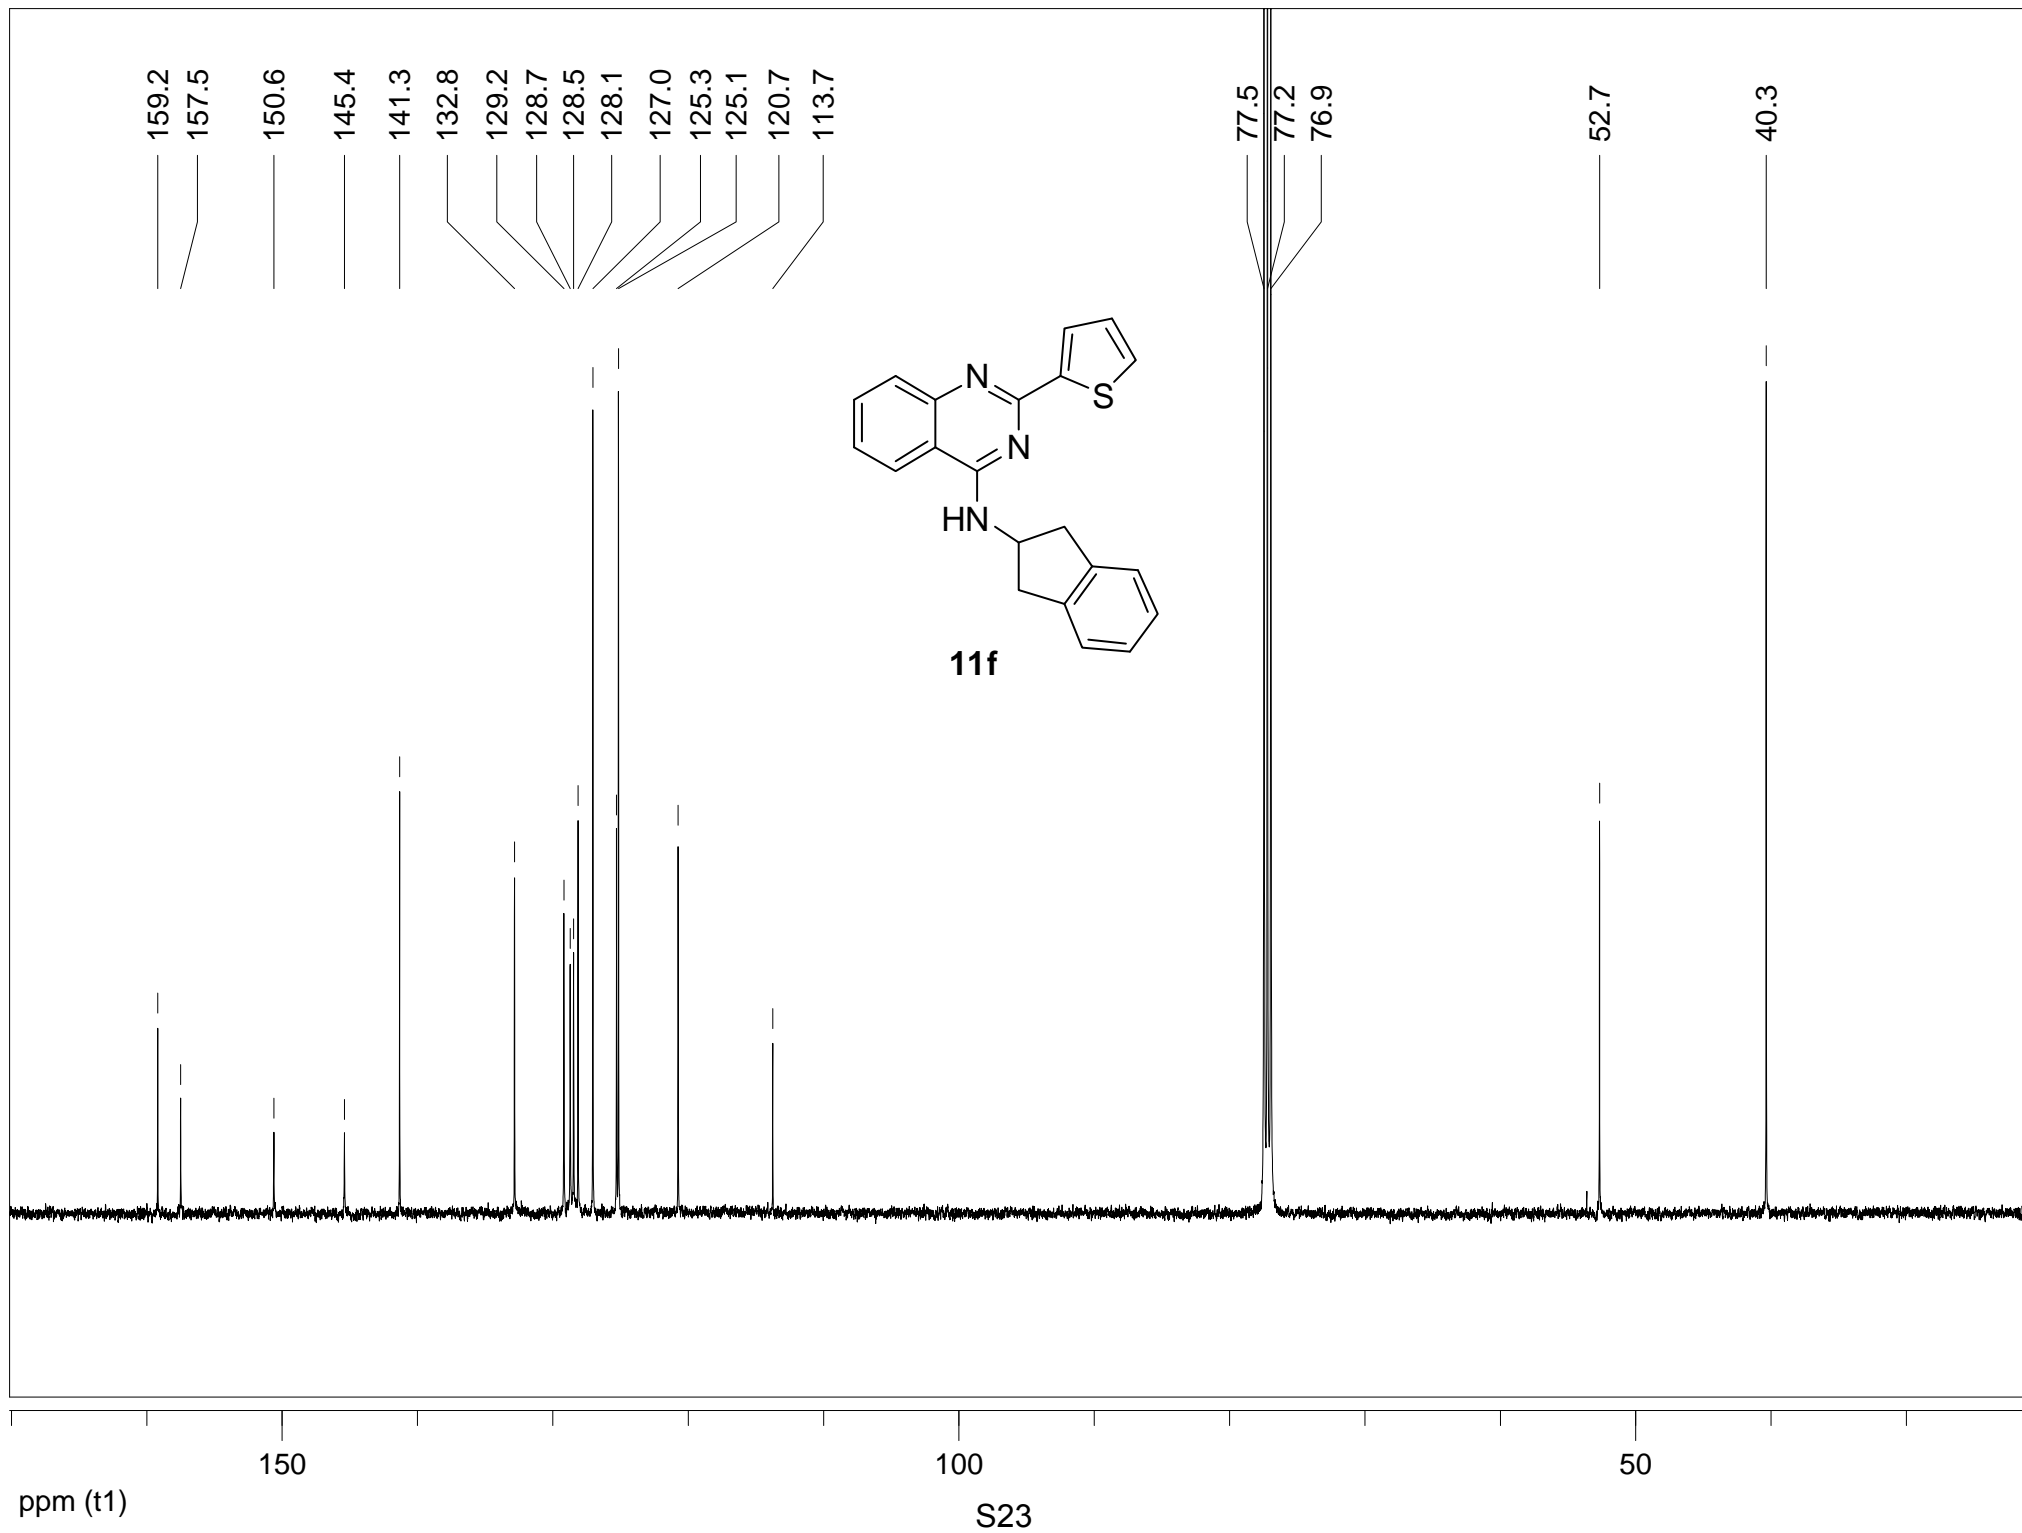

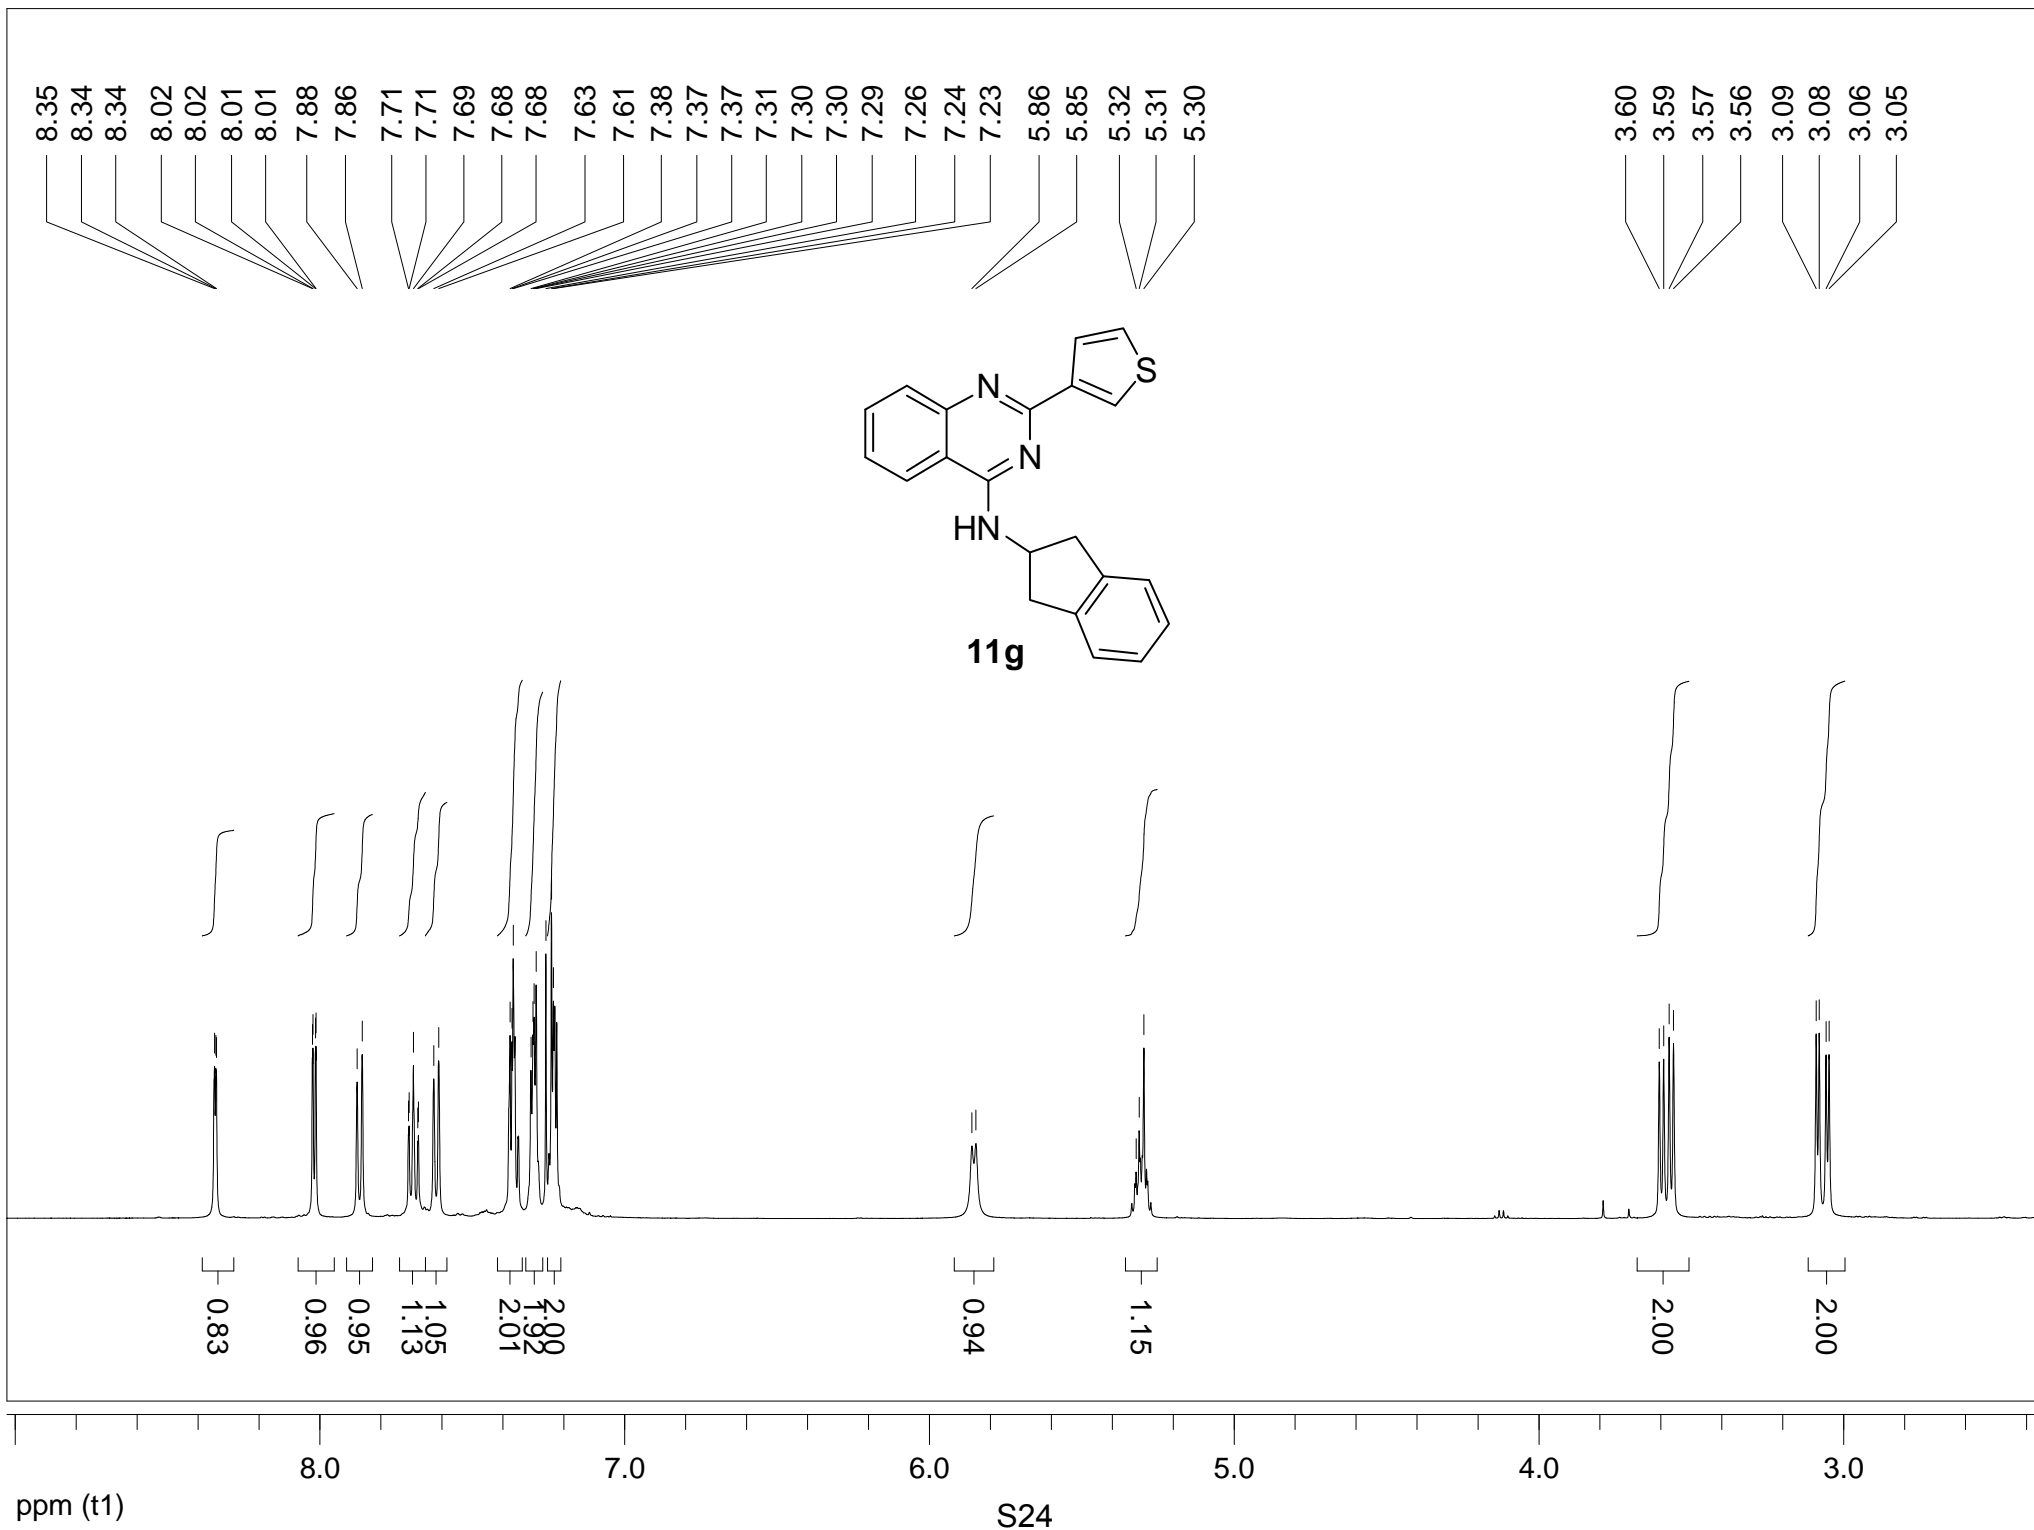



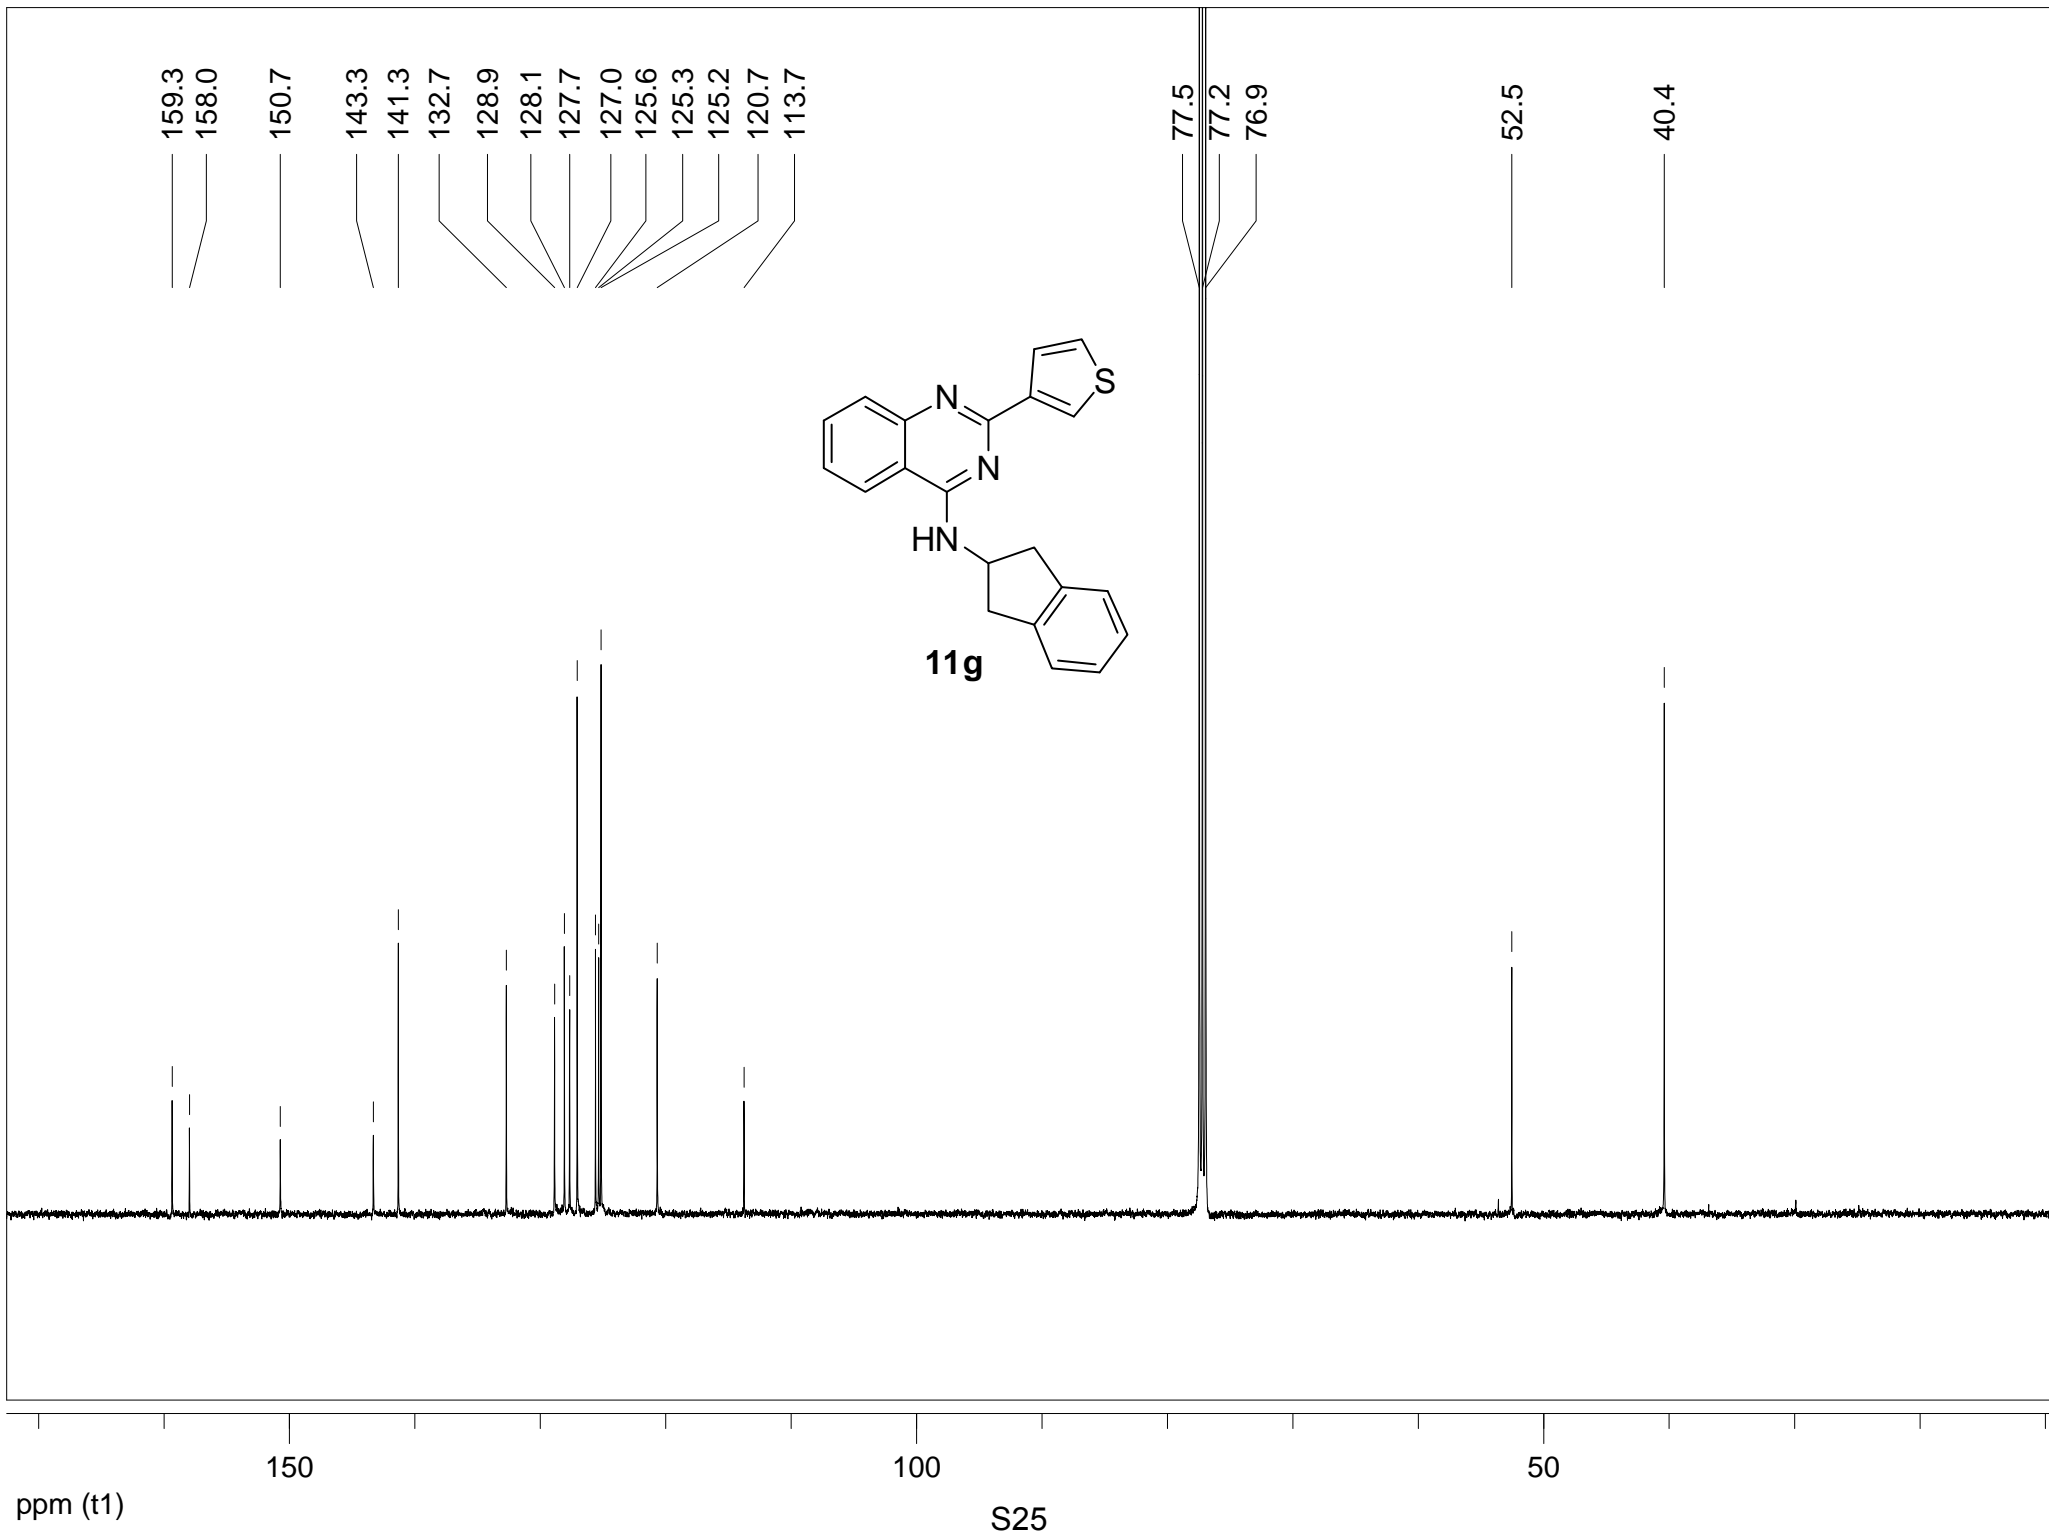

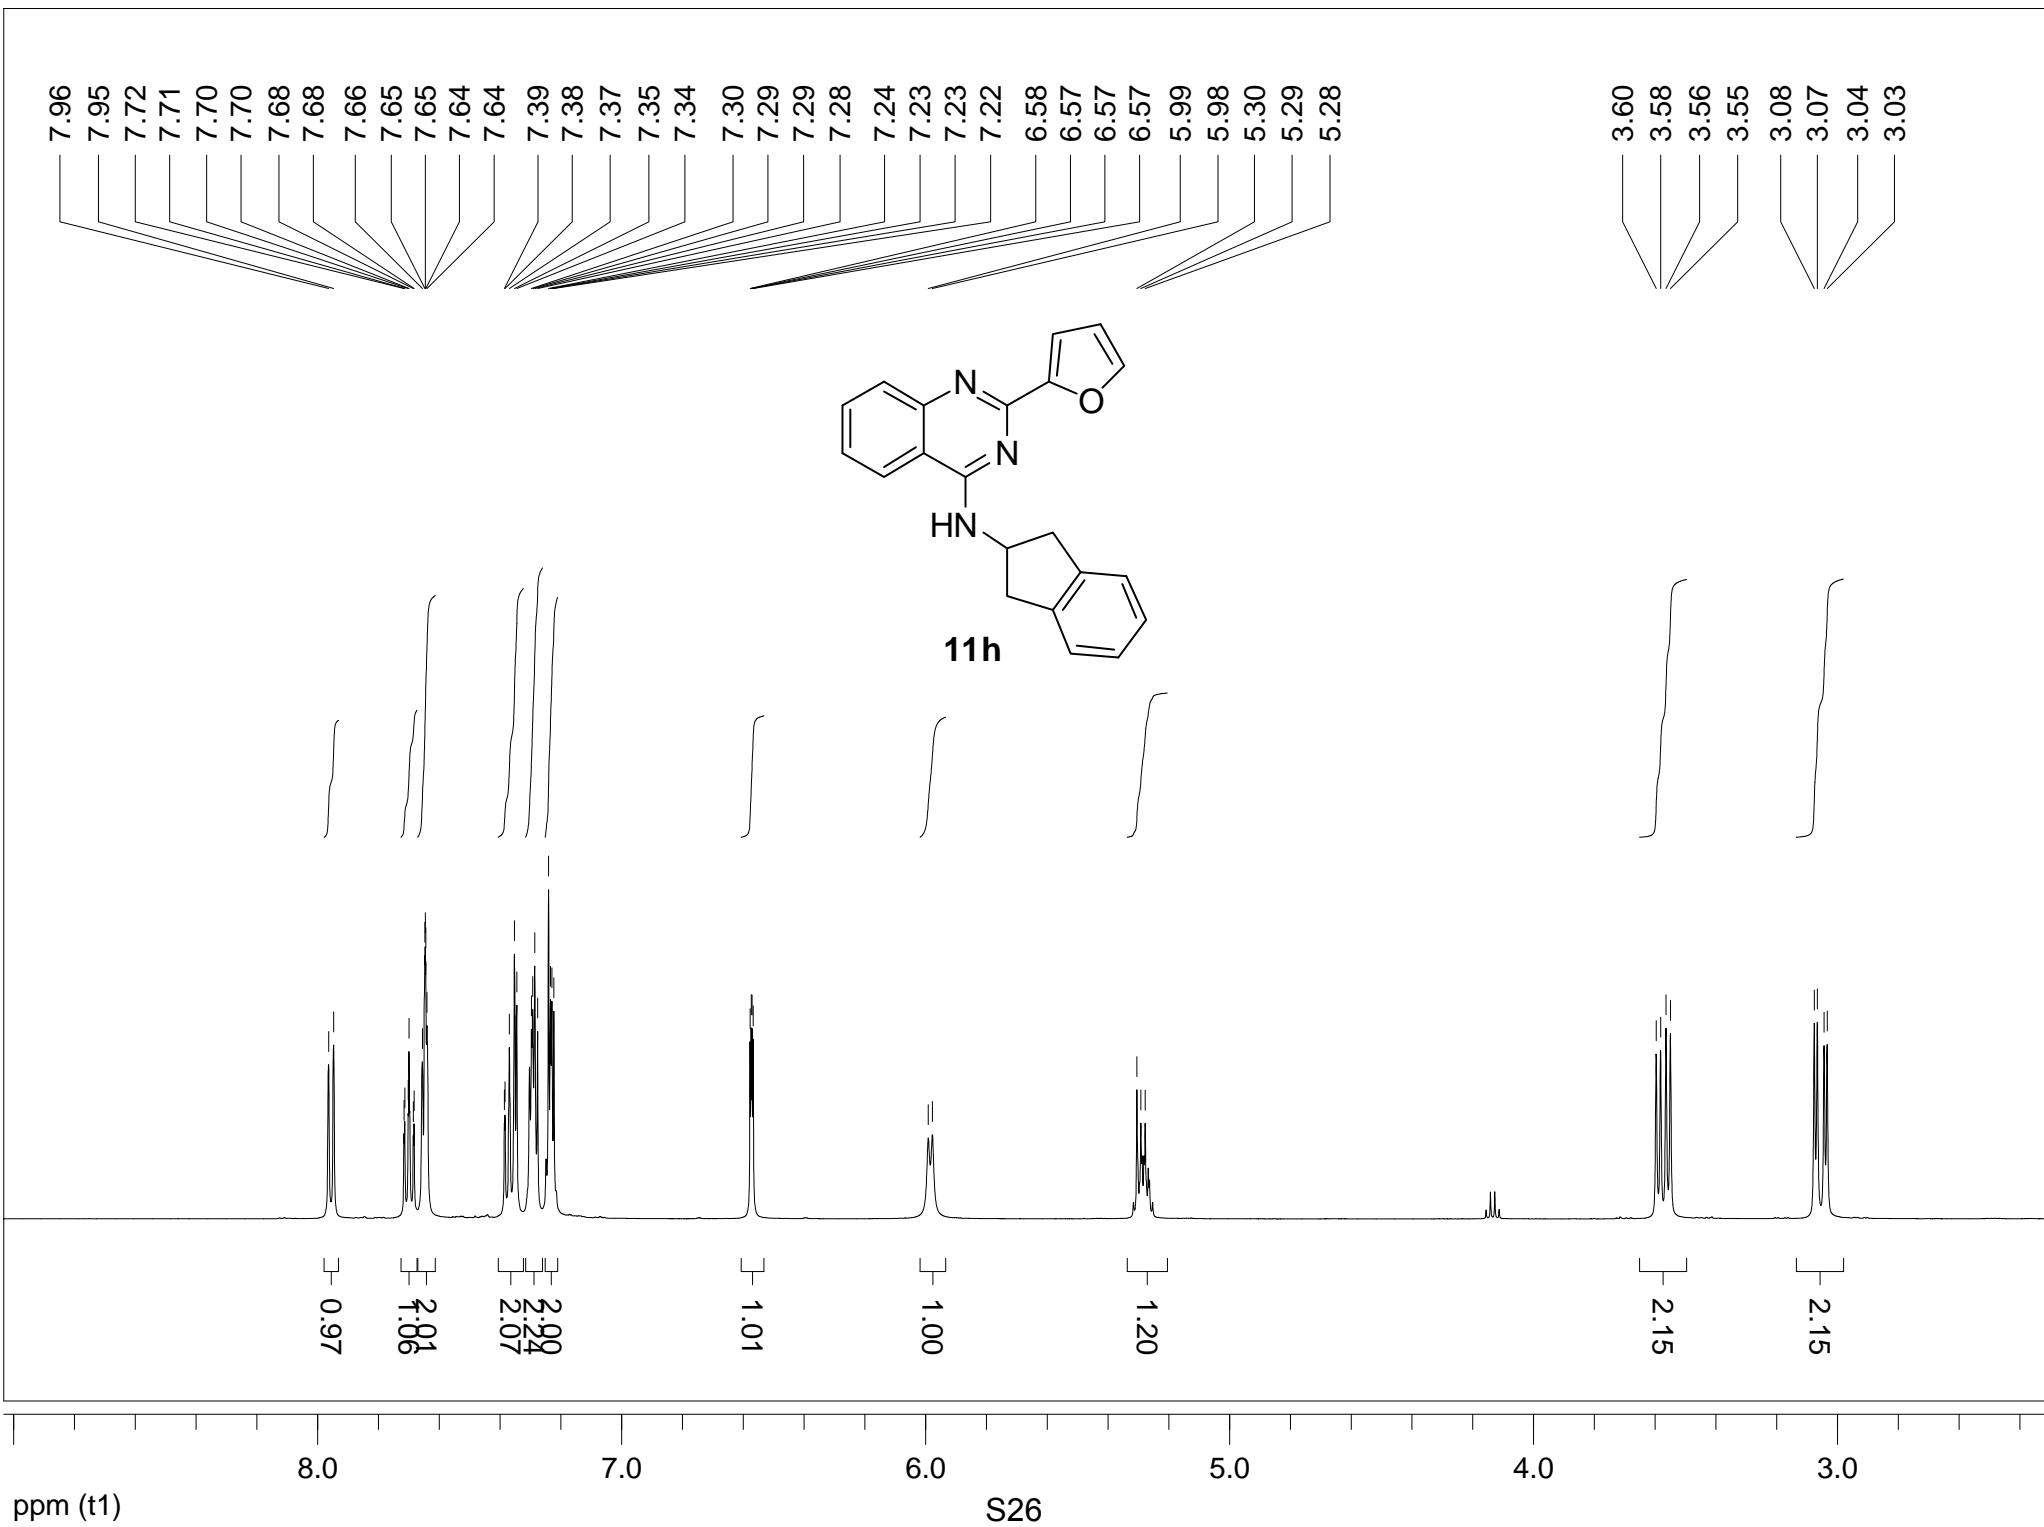

Supplement: NIHMS812481-supplement-Supporting_Information.pdf [file NIHMS812481-supplement-Supporting_Information.pdf]
